# Supplementary material for: Stress coping strategies used by nurses during the COVID-19 pandemic
Source: PeerJ. 2022 May 2;10:e13288. doi: 10.7717/peerj.13288 (PMC9070319; doi:10.7717/peerj.13288)
Supplement: Supplemental Information 1 [file peerj-10-13288-s001.xlsx]

## Sheet: Number of responses 1
Timestamp	1.Age	7. Work experience		9. Working hours system	10. Is overtime work required?	Are there too few nurses in the workplace?	Are contract duty hours offered to nurses?	4. Marital status (you can choose more answers, ticking having children)	5. Education	8. Workplace	17. How do you rate your health - choose a value on a scale from 1 to 5	16. How do you evaluate the atmosphere at work in terms of the possibility of getting peer support - choose a value on a scale from 1 to 5koleżeńskiego - wybierz wartość w skali od 1 do 5	Is there an employee motivation system at work, e.g. a bonus?	Is the workplace equipped with equipment that facilitates the performance of unburdened care procedures (mats, lifts, etc.) procedur	11.Is your job your only job (multiple answers possible)?	13. Does the employer provide information on SARS-CoV-2 on an ongoing basis?			1. 1. When I am in a very difficult situation, it is usually: I do work or other activities so as not to think about it	1. I am always able to solve difficult problems if I try hard enough													2. When I am in a very difficult situation, it is usually: My efforts are focused on doing something about the situation	3. When I am in a very difficult situation, it is usually: I say to myself "it's not true"	4. When I am in a very difficult situation, it is usually: I drink alcohol or take it	5. When I am in a very difficult situation, it is usually: I get emotional support from others	6. When I am in a very difficult situation, it is usually: I give up trying to achieve my goal	7. When I am in a very difficult situation, I usually: I am taking action to improve the situation	8. When I'm in a very difficult situation, it's usually: I don't want to believe it really happened	9. When I am in a very difficult situation, it is usually: I talk about things that help me get away from unpleasant feelings	10.When I am in a very difficult situation, I usually: I seek advice and help from others about what to doodnośnie tego, co należy zrobić	11.When I am in a very difficult situation, it is usually: I drink alcohol or take other measures to help me get through it	12.When I'm in a very difficult situation, it's usually: I try to see it in a different, more positive light	13. When I'm in a very difficult situation, it's usually: I criticize myself	14. When I am in a very difficult situation, it is usually: I try to develop a strategy or plan outlining	15. When I am in a very difficult situation, it is usually: I receive encouragement and understanding from others	16. When I am in a very difficult situation, it is usually: I give up on dealing with it	17. When I am in a very difficult situation, I usually: I am looking for good points in what happened	18. When I'm in a very difficult situation, it's usually: I'm joking about it
2020-12-01 00:33:19	55	1-5 years		two-shift	sometimes	yes	yes	with kids
2020-12-01 19:19:59	58	26			yes	yes	yes	in relation with																								Legend:
2020-12-01 19:39:40	50	30																			Legend:											0 = I hardly ever do this
2020-12-08 11:50:26	47	27		single shift	no			in relation with	higher master's degree	primary care nurse	4	4			No, I still work in a different workplace	Yes		Legend:	2 = I do this often	2 – I do not think so	1 - no											1 = I rarely do this	2 = I do this often	0 = I hardly ever do this	0 = prawie nigdy tak nie postępuję	1 = rzadko tak postępuję	2 = często tak postępuję	2 = często tak postępuję	0 = prawie nigdy tak nie postępuję	1 = rzadko tak postępuję	2 = często tak postępuję	0 = prawie nigdy tak nie postępuję	2 = często tak postępuję	2 = często tak postępuję	2 = często tak postępuję	2 = często tak postępuję	1 = rzadko tak postępuję	2 = często tak postępuję	1 = rzadko tak postępuję
2020-12-09 18:37:50	52	30		single shift	No			in relation with	doctor of health sciences	primary care nurse	3	3			No, I still work in a different workplace	No		0 = I hardly ever do thad	2 = często tak postępuję	3 – rather yes	2 – I do not think so											2 = I do this often	2 = często tak postępuję	0 = prawie nigdy tak nie postępuję	0 = prawie nigdy tak nie postępuję	3 = prawie zawsze tak postępuję	1 = rzadko tak postępuję	2 = często tak postępuję	0 = prawie nigdy tak nie postępuję	2 = często tak postępuję	3 = prawie zawsze tak postępuję	0 = prawie nigdy tak nie postępuję	1 = rzadko tak postępuję	3 = prawie zawsze tak postępuję	2 = często tak postępuję	2 = często tak postępuję	0 = prawie nigdy tak nie postępuję	1 = rzadko tak postępuję	1 = rzadko tak postępuję
2020-12-09 21:25:25	28	6 years		shift (12 hours)	Yes, quite often			in a relationship, without the children	higher master's degree	section nurse	3	3			No, I still work in a different workplace	Yes		1 = I rarely do thad	2 = często tak postępuję	3 – raczej tak	3 – rather yes											3 = I almost always do this	2 = często tak postępuję	1 = rzadko tak postępuję	1 = rzadko tak postępuję	2 = często tak postępuję	1 = rzadko tak postępuję	2 = często tak postępuję	1 = rzadko tak postępuję	2 = często tak postępuję	2 = często tak postępuję	1 = rzadko tak postępuję	1 = rzadko tak postępuję	1 = rzadko tak postępuję	2 = często tak postępuję	2 = często tak postępuję	1 = rzadko tak postępuję	2 = często tak postępuję	2 = często tak postępuję
2020-12-09 21:26:55	49	13 years		single shift	sometimes			in connection with children	higher master's degree	managing nurse	3	4			No, I still work in a different workplace	Yes		2 = I do this often	1 = I rarely do this	4 –yes	4 – yes												3 = I almost always do this	0 = prawie nigdy tak nie postępuję	0 = prawie nigdy tak nie postępuję	3 = prawie zawsze tak postępuję	0 = prawie nigdy tak nie postępuję	3 = prawie zawsze tak postępuję	0 = prawie nigdy tak nie postępuję	0 = prawie nigdy tak nie postępuję	3 = prawie zawsze tak postępuję	0 = prawie nigdy tak nie postępuję	2 = często tak postępuję	1 = rzadko tak postępuję	3 = prawie zawsze tak postępuję	3 = prawie zawsze tak postępuję	0 = prawie nigdy tak nie postępuję	2 = często tak postępuję	2 = często tak postępuję
2020-12-09 21:55:29	28	7 years		single shift	Yes, quite often			Miss / Bachelor	secondary/post-secondary	section nurse	2	3			Yes	Yes		3 = I almost always do thad	2 = często tak postępuję	4 – tak													3 = prawie zawsze tak postępuję	3 = prawie zawsze tak postępuję	3 = prawie zawsze tak postępuję	3 = prawie zawsze tak postępuję	3 = prawie zawsze tak postępuję	3 = prawie zawsze tak postępuję	3 = prawie zawsze tak postępuję	3 = prawie zawsze tak postępuję	3 = prawie zawsze tak postępuję	3 = prawie zawsze tak postępuję	3 = prawie zawsze tak postępuję	3 = prawie zawsze tak postępuję	3 = prawie zawsze tak postępuję	3 = prawie zawsze tak postępuję	3 = prawie zawsze tak postępuję	3 = prawie zawsze tak postępuję	3 = prawie zawsze tak postępuję
2020-12-09 22:01:04	25	2,5 years		shift (12 hours)	No			in connection with children	higher master's degree	section nurse	4	4			Yes	Yes			2 = często tak postępuję	3 – raczej tak													2 = często tak postępuję	1 = rzadko tak postępuję	0 = prawie nigdy tak nie postępuję	3 = prawie zawsze tak postępuję	0 = prawie nigdy tak nie postępuję	3 = prawie zawsze tak postępuję	1 = rzadko tak postępuję	2 = często tak postępuję	3 = prawie zawsze tak postępuję	0 = prawie nigdy tak nie postępuję	3 = prawie zawsze tak postępuję	0 = prawie nigdy tak nie postępuję	3 = prawie zawsze tak postępuję	3 = prawie zawsze tak postępuję	0 = prawie nigdy tak nie postępuję	3 = prawie zawsze tak postępuję	0 = prawie nigdy tak nie postępuję
2020-12-09 22:02:39	35	5		shift (12 hours)	No			in connection with children	higher master's degree	section nurse	5	5			No, I still work in a different workplace	Yes			2 = często tak postępuję	4 – tak													2 = często tak postępuję	0 = prawie nigdy tak nie postępuję	0 = prawie nigdy tak nie postępuję	1 = rzadko tak postępuję	0 = prawie nigdy tak nie postępuję	3 = prawie zawsze tak postępuję	0 = prawie nigdy tak nie postępuję	1 = rzadko tak postępuję	1 = rzadko tak postępuję	0 = prawie nigdy tak nie postępuję	2 = często tak postępuję	2 = często tak postępuję	2 = często tak postępuję	1 = rzadko tak postępuję	0 = prawie nigdy tak nie postępuję	2 = często tak postępuję	0 = prawie nigdy tak nie postępuję
2020-12-09 22:31:42	43	24		single shift	sometimes			in connection with children	doctor of health sciences	managing nurse	3	3			No, I still work in a different workplace	Yes			3 = I almost always do that	2 – raczej nie													3 = prawie zawsze tak postępuję	0 = prawie nigdy tak nie postępuję	0 = prawie nigdy tak nie postępuję	1 = rzadko tak postępuję	1 = rzadko tak postępuję	2 = często tak postępuję	0 = prawie nigdy tak nie postępuję	0 = prawie nigdy tak nie postępuję	1 = rzadko tak postępuję	0 = prawie nigdy tak nie postępuję	1 = rzadko tak postępuję	1 = rzadko tak postępuję	3 = prawie zawsze tak postępuję	2 = często tak postępuję	1 = rzadko tak postępuję	2 = często tak postępuję	2 = często tak postępuję
2020-12-09 22:42:26	56	37		shift (12 hours)	sometimes			in relation with	secondary/post-secondary	section nurse	4	3			Yes	Occasionally			2 = często tak postępuję	3 – raczej tak													2 = często tak postępuję	1 = rzadko tak postępuję	0 = prawie nigdy tak nie postępuję	1 = rzadko tak postępuję	1 = rzadko tak postępuję	2 = często tak postępuję	1 = rzadko tak postępuję	1 = rzadko tak postępuję	1 = rzadko tak postępuję	0 = prawie nigdy tak nie postępuję	2 = często tak postępuję	1 = rzadko tak postępuję	2 = często tak postępuję	1 = rzadko tak postępuję	1 = rzadko tak postępuję	2 = często tak postępuję	2 = często tak postępuję
2020-12-09 22:47:06	45	16		shift (12 hours)	sometimes			with kids	higher master's degree	section nurse	4	4			Yes	Occasionally			2 = często tak postępuję	2 – raczej nie													1 = I rarely do this	0 = prawie nigdy tak nie postępuję	0 = prawie nigdy tak nie postępuję	3 = prawie zawsze tak postępuję	1 = rzadko tak postępuję	2 = często tak postępuję	1 = rzadko tak postępuję	2 = często tak postępuję	3 = prawie zawsze tak postępuję	0 = prawie nigdy tak nie postępuję	2 = często tak postępuję	1 = rzadko tak postępuję	1 = rzadko tak postępuję	3 = prawie zawsze tak postępuję	1 = rzadko tak postępuję	2 = często tak postępuję	0 = prawie nigdy tak nie postępuję
2020-12-09 22:52:23	23	2 months		shift (12 hours)	No			Miss / Bachelor	bachelor's degree	section nurse	4	3			Yes	Occasionally			1 = rzadko tak postępuję	3 – raczej tak													2 = często tak postępuję	1 = rzadko tak postępuję	1 = rzadko tak postępuję	3 = prawie zawsze tak postępuję	1 = rzadko tak postępuję	2 = często tak postępuję	1 = rzadko tak postępuję	2 = często tak postępuję	3 = prawie zawsze tak postępuję	1 = rzadko tak postępuję	2 = często tak postępuję	1 = rzadko tak postępuję	2 = często tak postępuję	3 = prawie zawsze tak postępuję	1 = rzadko tak postępuję	2 = często tak postępuję	2 = często tak postępuję
2020-12-09 23:06:43	52	30		shift (12 hours)	sometimes			in relation with	higher master's degree	independent specialist	3	5			Yes	Yes			0 = I hardly ever do thad	3 – raczej tak													2 = często tak postępuję	0 = prawie nigdy tak nie postępuję	0 = prawie nigdy tak nie postępuję	3 = prawie zawsze tak postępuję	0 = prawie nigdy tak nie postępuję	3 = prawie zawsze tak postępuję	0 = prawie nigdy tak nie postępuję	2 = często tak postępuję	1 = rzadko tak postępuję	0 = prawie nigdy tak nie postępuję	3 = prawie zawsze tak postępuję	0 = prawie nigdy tak nie postępuję	2 = często tak postępuję	3 = prawie zawsze tak postępuję	0 = prawie nigdy tak nie postępuję	3 = prawie zawsze tak postępuję	2 = często tak postępuję
2020-12-10 00:05:29	55	35		single shift	Yes, quite often			in connection with children	higher master's degree	independent specialist	3	3			No, I still work in a different workplace	Occasionally			3 = prawie zawsze tak postępuję	3 – raczej tak													3 = prawie zawsze tak postępuję	0 = prawie nigdy tak nie postępuję	1 = rzadko tak postępuję	1 = rzadko tak postępuję	1 = rzadko tak postępuję	3 = prawie zawsze tak postępuję	0 = prawie nigdy tak nie postępuję	2 = często tak postępuję	3 = prawie zawsze tak postępuję	1 = rzadko tak postępuję	2 = często tak postępuję	1 = rzadko tak postępuję	2 = często tak postępuję	0 = prawie nigdy tak nie postępuję	0 = prawie nigdy tak nie postępuję	2 = często tak postępuję	2 = często tak postępuję
2020-12-10 07:08:09	60	40		single shift	sometimes			in relation with	higher master's degree	ward nurse, coordinating nurse	4	4			No, I still work in a different workplace	Yes			1 = rzadko tak postępuję	3 – raczej tak													2 = często tak postępuję	1 = rzadko tak postępuję	0 = prawie nigdy tak nie postępuję	2 = często tak postępuję	0 = prawie nigdy tak nie postępuję	3 = prawie zawsze tak postępuję	1 = rzadko tak postępuję	2 = często tak postępuję	2 = często tak postępuję	0 = prawie nigdy tak nie postępuję	2 = często tak postępuję	1 = rzadko tak postępuję	2 = często tak postępuję	2 = często tak postępuję	1 = rzadko tak postępuję	2 = często tak postępuję	2 = często tak postępuję
2020-12-10 08:15:00	61	40 years		single shift	No			wdowa/wdowiec	higher master's degree	managing nurse	4	4			Yes	Yes			2 = często tak postępuję	3 – raczej tak													2 = często tak postępuję	1 = rzadko tak postępuję	0 = prawie nigdy tak nie postępuję	2 = często tak postępuję	1 = rzadko tak postępuję	2 = często tak postępuję	1 = rzadko tak postępuję	1 = rzadko tak postępuję	1 = rzadko tak postępuję	0 = prawie nigdy tak nie postępuję	2 = często tak postępuję	1 = rzadko tak postępuję	2 = często tak postępuję	2 = często tak postępuję	1 = rzadko tak postępuję	2 = często tak postępuję	1 = rzadko tak postępuję
2020-12-10 08:55:09	27	4		shift (12 hours)	sometimes			in a relationship, without the children	higher master's degree	section nurse	5	5			No, I still work in a different workplace	Nie			2 = często tak postępuję	4 – tak													2 = często tak postępuję	0 = prawie nigdy tak nie postępuję	1 = rzadko tak postępuję	3 = prawie zawsze tak postępuję	0 = prawie nigdy tak nie postępuję	3 = prawie zawsze tak postępuję	0 = prawie nigdy tak nie postępuję	1 = rzadko tak postępuję	2 = często tak postępuję	1 = rzadko tak postępuję	3 = prawie zawsze tak postępuję	0 = prawie nigdy tak nie postępuję	3 = prawie zawsze tak postępuję	3 = prawie zawsze tak postępuję	0 = prawie nigdy tak nie postępuję	3 = prawie zawsze tak postępuję	1 = rzadko tak postępuję
2020-12-10 09:10:30	44	14		shift (12 hours)	Yes, quite often			in connection with children	higher master's degree	section nurse	4	4			Yes	Yes			1 = rzadko tak postępuję	4 – tak													3 = prawie zawsze tak postępuję	0 = prawie nigdy tak nie postępuję	0 = prawie nigdy tak nie postępuję	2 = często tak postępuję	0 = prawie nigdy tak nie postępuję	3 = prawie zawsze tak postępuję	0 = prawie nigdy tak nie postępuję	1 = rzadko tak postępuję	2 = często tak postępuję	0 = prawie nigdy tak nie postępuję	3 = prawie zawsze tak postępuję	0 = prawie nigdy tak nie postępuję	3 = prawie zawsze tak postępuję	2 = często tak postępuję	0 = prawie nigdy tak nie postępuję	2 = często tak postępuję	1 = rzadko tak postępuję
2020-12-10 09:55:06	22	5 months		shift (12 hours)	sometimes			in relation with	bachelor's degree	section nurse	3	2			Yes	Yes			2 = często tak postępuję	3 – raczej tak													2 = często tak postępuję	0 = prawie nigdy tak nie postępuję	0 = prawie nigdy tak nie postępuję	2 = często tak postępuję	1 = rzadko tak postępuję	2 = często tak postępuję	1 = rzadko tak postępuję	2 = często tak postępuję	2 = często tak postępuję	0 = prawie nigdy tak nie postępuję	2 = często tak postępuję	2 = często tak postępuję	2 = często tak postępuję	2 = często tak postępuję	1 = rzadko tak postępuję	2 = często tak postępuję	2 = często tak postępuję
2020-12-10 09:57:27	22	3 months		shift (12 hours)	sometimes			Miss / Bachelor	bachelor's degree	independent, specialist nursing position	4	4			Yes	Yes			2 = często tak postępuję	4 – tak													2 = często tak postępuję	1 = rzadko tak postępuję	0 = prawie nigdy tak nie postępuję	2 = często tak postępuję	0 = prawie nigdy tak nie postępuję	2 = często tak postępuję	1 = rzadko tak postępuję	1 = rzadko tak postępuję	2 = często tak postępuję	0 = prawie nigdy tak nie postępuję	2 = często tak postępuję	1 = rzadko tak postępuję	2 = często tak postępuję	2 = często tak postępuję	1 = rzadko tak postępuję	2 = często tak postępuję	3 = prawie zawsze tak postępuję
2020-12-10 10:00:29	22	3 months		shift (12 hours)	sometimes			in a relationship, without the children	bachelor's degree	section nurse	4	5			No, I still work in a different workplace	Occasionally			1 = rzadko tak postępuję	3 – raczej tak													2 = często tak postępuję	1 = rzadko tak postępuję	0 = prawie nigdy tak nie postępuję	2 = często tak postępuję	1 = rzadko tak postępuję	3 = prawie zawsze tak postępuję	2 = często tak postępuję	1 = rzadko tak postępuję	2 = często tak postępuję	0 = prawie nigdy tak nie postępuję	2 = często tak postępuję	1 = rzadko tak postępuję	2 = często tak postępuję	2 = często tak postępuję	0 = prawie nigdy tak nie postępuję	2 = często tak postępuję	2 = często tak postępuję
2020-12-10 10:01:35	45	15		24-hour	No			in connection with children	bachelor's degree	independent specialist	5	4			Yes	Yes			1 = rzadko tak postępuję	3 – raczej tak													1 = rzadko tak postępuję	0 = prawie nigdy tak nie postępuję	0 = prawie nigdy tak nie postępuję	2 = często tak postępuję	0 = prawie nigdy tak nie postępuję	3 = prawie zawsze tak postępuję	0 = prawie nigdy tak nie postępuję	0 = prawie nigdy tak nie postępuję	3 = prawie zawsze tak postępuję	0 = prawie nigdy tak nie postępuję	2 = często tak postępuję	1 = rzadko tak postępuję	3 = prawie zawsze tak postępuję	2 = często tak postępuję	0 = prawie nigdy tak nie postępuję	2 = często tak postępuję	2 = często tak postępuję
2020-12-10 10:08:32	23	3 months		shift (12 hours)	sometimes			Miss / Bachelor	bachelor's degree	section nurse	2	4			Yes, I take medical duty on a part-time basis	Occasionally			1 = rzadko tak postępuję	2 – raczej nie													1 = rzadko tak postępuję	0 = prawie nigdy tak nie postępuję	2 = często tak postępuję	0 = prawie nigdy tak nie postępuję	2 = często tak postępuję	1 = rzadko tak postępuję	2 = często tak postępuję	2 = często tak postępuję	0 = prawie nigdy tak nie postępuję	2 = często tak postępuję	0 = prawie nigdy tak nie postępuję	3 = prawie zawsze tak postępuję	0 = prawie nigdy tak nie postępuję	1 = rzadko tak postępuję	3 = prawie zawsze tak postępuję	0 = prawie nigdy tak nie postępuję	3 = prawie zawsze tak postępuję
2020-12-10 10:08:34	21	4 months		shift (12 hours)	sometimes			Miss / Bachelor	bachelor's degree	section nurse	3	4			Yes	Occasionally			3 = prawie zawsze tak postępuję	3 – raczej tak													2 = często tak postępuję	1 = rzadko tak postępuję	0 = prawie nigdy tak nie postępuję	2 = często tak postępuję	1 = rzadko tak postępuję	3 = prawie zawsze tak postępuję	0 = prawie nigdy tak nie postępuję	2 = często tak postępuję	3 = prawie zawsze tak postępuję	0 = prawie nigdy tak nie postępuję	2 = często tak postępuję	3 = prawie zawsze tak postępuję	3 = prawie zawsze tak postępuję	2 = często tak postępuję	1 = rzadko tak postępuję	0 = prawie nigdy tak nie postępuję	3 = prawie zawsze tak postępuję
2020-12-10 10:09:41	23	3 months		shift (12 hours)	sometimes			in a relationship, without the children	bachelor's degree	section nurse	4	4			Yes	Yes			1 = rzadko tak postępuję	3 – raczej tak													2 = często tak postępuję	0 = prawie nigdy tak nie postępuję	0 = prawie nigdy tak nie postępuję	2 = często tak postępuję	0 = prawie nigdy tak nie postępuję	2 = często tak postępuję	1 = rzadko tak postępuję	2 = często tak postępuję	2 = często tak postępuję	0 = prawie nigdy tak nie postępuję	2 = często tak postępuję	1 = rzadko tak postępuję	2 = często tak postępuję	2 = często tak postępuję	0 = prawie nigdy tak nie postępuję	2 = często tak postępuję	1 = rzadko tak postępuję
2020-12-10 10:09:53	29	3		shift (12 hours)	Yes, quite often			in relation with	higher master's degree	section nurse	4	5			No, I still work in a different workplace	Yes			3 = prawie zawsze tak postępuję	3 – raczej tak													2 = często tak postępuję	1 = rzadko tak postępuję	0 = prawie nigdy tak nie postępuję	2 = często tak postępuję	1 = rzadko tak postępuję	2 = często tak postępuję	0 = prawie nigdy tak nie postępuję	1 = rzadko tak postępuję	1 = rzadko tak postępuję	0 = prawie nigdy tak nie postępuję	1 = rzadko tak postępuję	2 = często tak postępuję	1 = rzadko tak postępuję	2 = często tak postępuję	1 = rzadko tak postępuję	2 = często tak postępuję	0 = prawie nigdy tak nie postępuję
2020-12-10 10:23:23	44	10 years		shift (12 hours)	sometimes			in relation with	higher master's degree	section nurse	5	2			Yes	Occasionally			3 = prawie zawsze tak postępuję	2 – raczej nie													3 = prawie zawsze tak postępuję	0 = prawie nigdy tak nie postępuję	0 = prawie nigdy tak nie postępuję	2 = często tak postępuję	0 = prawie nigdy tak nie postępuję	3 = prawie zawsze tak postępuję	0 = prawie nigdy tak nie postępuję	0 = prawie nigdy tak nie postępuję	2 = często tak postępuję	0 = prawie nigdy tak nie postępuję	1 = rzadko tak postępuję	1 = rzadko tak postępuję	1 = rzadko tak postępuję	2 = często tak postępuję	0 = prawie nigdy tak nie postępuję	1 = rzadko tak postępuję	0 = prawie nigdy tak nie postępuję
2020-12-10 10:24:57	22	3 msc		shift (12 hours)	sometimes			Miss / Bachelor	bachelor's degree	section nurse	4	4			Yes	Yes			0 = prawie nigdy tak nie postępuję	3 – raczej tak													3 = prawie zawsze tak postępuję	0 = prawie nigdy tak nie postępuję	0 = prawie nigdy tak nie postępuję	2 = często tak postępuję	1 = rzadko tak postępuję	3 = prawie zawsze tak postępuję	0 = prawie nigdy tak nie postępuję	3 = prawie zawsze tak postępuję	1 = rzadko tak postępuję	0 = prawie nigdy tak nie postępuję	2 = często tak postępuję	1 = rzadko tak postępuję	3 = prawie zawsze tak postępuję	3 = prawie zawsze tak postępuję	0 = prawie nigdy tak nie postępuję	2 = często tak postępuję	1 = rzadko tak postępuję
2020-12-10 10:26:57	22	3 months		shift (12 hours)	Yes, quite often			in relation with	bachelor's degree	independent specialist	4	3			Yes	Occasionally			0 = prawie nigdy tak nie postępuję	3 – raczej tak													3 = prawie zawsze tak postępuję	0 = prawie nigdy tak nie postępuję	1 = rzadko tak postępuję	3 = prawie zawsze tak postępuję	1 = rzadko tak postępuję	3 = prawie zawsze tak postępuję	1 = rzadko tak postępuję	2 = często tak postępuję	3 = prawie zawsze tak postępuję	1 = rzadko tak postępuję	2 = często tak postępuję	2 = często tak postępuję	2 = często tak postępuję	3 = prawie zawsze tak postępuję	1 = rzadko tak postępuję	2 = często tak postępuję	0 = prawie nigdy tak nie postępuję
2020-12-10 10:27:06	33	6.5 years		single shift	sometimes			samotna/y, bez dzieci	higher master's degree	independent specialist	4	4			Yes	Occasionally			1 = rzadko tak postępuję	3 – raczej tak													1 = rzadko tak postępuję	1 = rzadko tak postępuję	2 = często tak postępuję	2 = często tak postępuję	2 = często tak postępuję	1 = rzadko tak postępuję	2 = często tak postępuję	2 = często tak postępuję	1 = rzadko tak postępuję	2 = często tak postępuję	2 = często tak postępuję	2 = często tak postępuję	1 = rzadko tak postępuję	1 = rzadko tak postępuję	2 = często tak postępuję	2 = często tak postępuję	1 = rzadko tak postępuję
2020-12-10 10:29:13	27	3 years		shift (12 hours)	Yes, quite often			Miss / Bachelor	higher master's degree	section nurse	4	3			Yes	Yes			2 = często tak postępuję	4 – tak													2 = często tak postępuję	0 = prawie nigdy tak nie postępuję	0 = prawie nigdy tak nie postępuję	1 = rzadko tak postępuję	0 = prawie nigdy tak nie postępuję	3 = prawie zawsze tak postępuję	0 = prawie nigdy tak nie postępuję	3 = prawie zawsze tak postępuję	3 = prawie zawsze tak postępuję	0 = prawie nigdy tak nie postępuję	3 = prawie zawsze tak postępuję	2 = często tak postępuję	2 = często tak postępuję	2 = często tak postępuję	0 = prawie nigdy tak nie postępuję	2 = często tak postępuję	1 = rzadko tak postępuję
2020-12-10 10:58:06	22	3 months		shift (12 hours)	sometimes			Miss / Bachelor	bachelor's degree	section nurse	4	5			Yes	Yes			1 = rzadko tak postępuję	3 – raczej tak													3 = prawie zawsze tak postępuję	0 = prawie nigdy tak nie postępuję	0 = prawie nigdy tak nie postępuję	3 = prawie zawsze tak postępuję	2 = często tak postępuję	2 = często tak postępuję	1 = rzadko tak postępuję	1 = rzadko tak postępuję	3 = prawie zawsze tak postępuję	0 = prawie nigdy tak nie postępuję	1 = rzadko tak postępuję	3 = prawie zawsze tak postępuję	2 = często tak postępuję	3 = prawie zawsze tak postępuję	1 = rzadko tak postępuję	2 = często tak postępuję	0 = prawie nigdy tak nie postępuję
2020-12-10 11:15:14	22	4 months		shift (12 hours)	sometimes			Miss / Bachelor	bachelor's degree	section nurse	4	4			Yes	Yes			3 = prawie zawsze tak postępuję	3 – raczej tak													2 = często tak postępuję	1 = rzadko tak postępuję	1 = rzadko tak postępuję	2 = często tak postępuję	2 = często tak postępuję	1 = rzadko tak postępuję	1 = rzadko tak postępuję	1 = rzadko tak postępuję	1 = rzadko tak postępuję	1 = rzadko tak postępuję	2 = często tak postępuję	3 = prawie zawsze tak postępuję	2 = często tak postępuję	1 = rzadko tak postępuję	1 = rzadko tak postępuję	1 = rzadko tak postępuję	1 = rzadko tak postępuję
2020-12-10 11:26:12	47	26		single shift	sometimes			in relation with	higher master's degree	ward nurse, coordinating nurse	5	5			No, I still work in a different workplace	Yes			1 = rzadko tak postępuję	4 – tak													2 = często tak postępuję	0 = prawie nigdy tak nie postępuję	0 = prawie nigdy tak nie postępuję	2 = często tak postępuję	0 = prawie nigdy tak nie postępuję	3 = prawie zawsze tak postępuję	1 = rzadko tak postępuję	1 = rzadko tak postępuję	1 = rzadko tak postępuję	0 = prawie nigdy tak nie postępuję	3 = prawie zawsze tak postępuję	0 = prawie nigdy tak nie postępuję	3 = prawie zawsze tak postępuję	2 = często tak postępuję	0 = prawie nigdy tak nie postępuję	2 = często tak postępuję	2 = często tak postępuję
2020-12-10 11:33:22	23	3 months		shift (12 hours)	Yes, quite often			in relation with	bachelor's degree	section nurse	5	4			No, I still work in a different workplace	No			2 = często tak postępuję	3 – raczej tak													3 = prawie zawsze tak postępuję	1 = rzadko tak postępuję	1 = rzadko tak postępuję	1 = rzadko tak postępuję	0 = prawie nigdy tak nie postępuję	3 = prawie zawsze tak postępuję	1 = rzadko tak postępuję	1 = rzadko tak postępuję	1 = rzadko tak postępuję	0 = prawie nigdy tak nie postępuję	2 = często tak postępuję	2 = często tak postępuję	3 = prawie zawsze tak postępuję	1 = rzadko tak postępuję	0 = prawie nigdy tak nie postępuję	2 = często tak postępuję	2 = często tak postępuję
2020-12-10 12:20:29	25	1 years		shift (12 hours)	sometimes			in relation with	higher master's degree	section nurse	4	4			Yes	Yes			2 = często tak postępuję	3 – raczej tak													2 = często tak postępuję	2 = często tak postępuję	2 = często tak postępuję	2 = często tak postępuję	2 = często tak postępuję	2 = często tak postępuję	2 = często tak postępuję	2 = często tak postępuję	2 = często tak postępuję	2 = często tak postępuję	2 = często tak postępuję	2 = często tak postępuję	2 = często tak postępuję	2 = często tak postępuję	2 = często tak postępuję	2 = często tak postępuję	2 = często tak postępuję
2020-12-10 12:34:08	51	30 years		shift (12 hours)	No			in relation with	bachelor's degree	section nurse	3	4			Tak	Yes			2 = często tak postępuję	3 – raczej tak													2 = często tak postępuję	1 = rzadko tak postępuję	0 = prawie nigdy tak nie postępuję	0 = prawie nigdy tak nie postępuję	1 = rzadko tak postępuję	2 = często tak postępuję	1 = rzadko tak postępuję	0 = prawie nigdy tak nie postępuję	1 = rzadko tak postępuję	0 = prawie nigdy tak nie postępuję	2 = często tak postępuję	1 = rzadko tak postępuję	2 = często tak postępuję	2 = często tak postępuję	0 = prawie nigdy tak nie postępuję	1 = rzadko tak postępuję	1 = rzadko tak postępuję
2020-12-10 12:34:22	50	30		medical duty + single shift	Yes, quite often			single	higher master's degree	ward nurse, coordinating nurse	4	5			No, I still work in a different workplace	Yes			2 = często tak postępuję	2 – raczej nie													2 = często tak postępuję	1 = rzadko tak postępuję	1 = rzadko tak postępuję	1 = rzadko tak postępuję	1 = rzadko tak postępuję	2 = często tak postępuję	1 = rzadko tak postępuję	1 = rzadko tak postępuję	1 = rzadko tak postępuję	0 = prawie nigdy tak nie postępuję	2 = często tak postępuję	2 = często tak postępuję	2 = często tak postępuję	0 = prawie nigdy tak nie postępuję	0 = prawie nigdy tak nie postępuję	2 = często tak postępuję	1 = rzadko tak postępuję
2020-12-10 12:39:45	24	2 years		shift (12 hours)	sometimes			in a relationship, without the children	higher master's degree	section nurse	3	3			Yes	Occasionally			2 = często tak postępuję	4 – tak													3 = prawie zawsze tak postępuję	1 = rzadko tak postępuję	0 = prawie nigdy tak nie postępuję	2 = często tak postępuję	1 = rzadko tak postępuję	2 = często tak postępuję	1 = rzadko tak postępuję	1 = rzadko tak postępuję	0 = prawie nigdy tak nie postępuję	0 = prawie nigdy tak nie postępuję	2 = często tak postępuję	2 = często tak postępuję	3 = prawie zawsze tak postępuję	2 = często tak postępuję	1 = rzadko tak postępuję	2 = często tak postępuję	1 = rzadko tak postępuję
2020-12-10 12:41:29	51	30		shift (12 hours)	Yes, quite often			in relation with	bachelor's degree	section nurse	2	4			Yes	Yes			2 = często tak postępuję	3 – raczej tak													3 = prawie zawsze tak postępuję	0 = prawie nigdy tak nie postępuję	0 = prawie nigdy tak nie postępuję	3 = prawie zawsze tak postępuję	1 = rzadko tak postępuję	2 = często tak postępuję	2 = często tak postępuję	0 = prawie nigdy tak nie postępuję	3 = prawie zawsze tak postępuję	0 = prawie nigdy tak nie postępuję	3 = prawie zawsze tak postępuję	3 = prawie zawsze tak postępuję	2 = często tak postępuję	3 = prawie zawsze tak postępuję	1 = rzadko tak postępuję	2 = często tak postępuję	0 = prawie nigdy tak nie postępuję
2020-12-10 12:42:50	51	31		shift (12 hours)	sometimes			in connection with children	bachelor's degree	section nurse	2	2			Yes	Yes			1 = rzadko tak postępuję	2 – raczej nie													2 = często tak postępuję	1 = rzadko tak postępuję	1 = rzadko tak postępuję	1 = rzadko tak postępuję	1 = rzadko tak postępuję	2 = często tak postępuję	1 = rzadko tak postępuję	1 = rzadko tak postępuję	2 = często tak postępuję	0 = prawie nigdy tak nie postępuję	2 = często tak postępuję	1 = rzadko tak postępuję	2 = często tak postępuję	1 = rzadko tak postępuję	1 = rzadko tak postępuję	2 = często tak postępuję	1 = rzadko tak postępuję
2020-12-10 12:48:40	49	30		single shift	sometimes			in connection with children	higher master's degree	ward nurse, coordinating nurse	5	5			Yes	Yes			2 = często tak postępuję	2 – raczej nie													2 = często tak postępuję	0 = prawie nigdy tak nie postępuję	0 = prawie nigdy tak nie postępuję	2 = często tak postępuję	1 = rzadko tak postępuję	2 = często tak postępuję	2 = często tak postępuję	1 = rzadko tak postępuję	1 = rzadko tak postępuję	0 = prawie nigdy tak nie postępuję	1 = rzadko tak postępuję	1 = rzadko tak postępuję	1 = rzadko tak postępuję	1 = rzadko tak postępuję	1 = rzadko tak postępuję	1 = rzadko tak postępuję	1 = rzadko tak postępuję
2020-12-10 12:51:17	40	15		shift (12 hours)	sometimes			in connection with children	bachelor's degree	section nurse	4	3			Yes	No			2 = często tak postępuję	3 – raczej tak													2 = często tak postępuję	1 = rzadko tak postępuję	0 = prawie nigdy tak nie postępuję	2 = często tak postępuję	1 = rzadko tak postępuję	2 = często tak postępuję	1 = rzadko tak postępuję	1 = rzadko tak postępuję	2 = często tak postępuję	0 = prawie nigdy tak nie postępuję	2 = często tak postępuję	1 = rzadko tak postępuję	2 = często tak postępuję	2 = często tak postępuję	1 = rzadko tak postępuję	2 = często tak postępuję	1 = rzadko tak postępuję
2020-12-10 13:09:31	50	26		shift (12 hours)	sometimes			in connection with children	bachelor's degree	section nurse	3	3			No, I still work in a different workplace	Yes			2 = często tak postępuję	3 – raczej tak													2 = często tak postępuję	1 = rzadko tak postępuję	0 = prawie nigdy tak nie postępuję	2 = często tak postępuję	0 = prawie nigdy tak nie postępuję	2 = często tak postępuję	1 = rzadko tak postępuję	2 = często tak postępuję	2 = często tak postępuję	0 = prawie nigdy tak nie postępuję	2 = często tak postępuję	2 = często tak postępuję	2 = często tak postępuję	2 = często tak postępuję	0 = prawie nigdy tak nie postępuję	2 = często tak postępuję	2 = często tak postępuję
2020-12-10 13:14:36	48	20		shift (12 hours)	sometimes			in connection without children	higher master's degree	section nurse	3	4			No, I still work in a different workplace	Yes			2 = często tak postępuję	3 – raczej tak													2 = często tak postępuję	1 = rzadko tak postępuję	0 = prawie nigdy tak nie postępuję	2 = często tak postępuję	1 = rzadko tak postępuję	2 = często tak postępuję	2 = często tak postępuję	2 = często tak postępuję	2 = często tak postępuję	0 = prawie nigdy tak nie postępuję	2 = często tak postępuję	1 = rzadko tak postępuję	2 = często tak postępuję	2 = często tak postępuję	0 = prawie nigdy tak nie postępuję	2 = często tak postępuję	1 = rzadko tak postępuję
2020-12-10 13:25:18	48	27		shift (12 hours)	No			in relation with	bachelor's degree	independent specialist	4	5			Yes	Yes			0 = prawie nigdy tak nie postępuję	4 – tak													3 = prawie zawsze tak postępuję	0 = prawie nigdy tak nie postępuję	1 = rzadko tak postępuję	2 = często tak postępuję	0 = prawie nigdy tak nie postępuję	3 = prawie zawsze tak postępuję	1 = rzadko tak postępuję	1 = rzadko tak postępuję	2 = często tak postępuję	0 = prawie nigdy tak nie postępuję	3 = prawie zawsze tak postępuję	0 = prawie nigdy tak nie postępuję	3 = prawie zawsze tak postępuję	2 = często tak postępuję	0 = prawie nigdy tak nie postępuję	2 = często tak postępuję	1 = rzadko tak postępuję
2020-12-10 13:27:12	48	25		shift (12 hours)	sometimes			in connection with children	bachelor's degree	section nurse	5	5			Yes	Yes			2 = często tak postępuję	3 – raczej tak													2 = często tak postępuję	1 = rzadko tak postępuję	0 = prawie nigdy tak nie postępuję	1 = rzadko tak postępuję	1 = rzadko tak postępuję	2 = często tak postępuję	1 = rzadko tak postępuję	2 = często tak postępuję	2 = często tak postępuję	0 = prawie nigdy tak nie postępuję	1 = rzadko tak postępuję	1 = rzadko tak postępuję	2 = często tak postępuję	2 = często tak postępuję	1 = rzadko tak postępuję	2 = często tak postępuję	1 = rzadko tak postępuję
2020-12-10 14:19:42	52	30		single shift	No			in relation with	bachelor's degree	section nurse	4	3			Yes	Yes			1 = rzadko tak postępuję	3 – raczej tak													2 = często tak postępuję	1 = rzadko tak postępuję	1 = rzadko tak postępuję	1 = rzadko tak postępuję	1 = rzadko tak postępuję	2 = często tak postępuję	1 = rzadko tak postępuję	1 = rzadko tak postępuję	1 = rzadko tak postępuję	1 = rzadko tak postępuję	1 = rzadko tak postępuję	2 = często tak postępuję	2 = często tak postępuję	2 = często tak postępuję	2 = często tak postępuję	2 = często tak postępuję	1 = rzadko tak postępuję
2020-12-10 14:50:35	57	35		shift (12 hours)	No			single with children	bachelor's degree	section nurse	2	2			Yes	No			1 = rzadko tak postępuję	3 – raczej tak													3 = prawie zawsze tak postępuję	1 = rzadko tak postępuję	0 = prawie nigdy tak nie postępuję	2 = często tak postępuję	0 = prawie nigdy tak nie postępuję	3 = prawie zawsze tak postępuję	0 = prawie nigdy tak nie postępuję	0 = prawie nigdy tak nie postępuję	2 = często tak postępuję	0 = prawie nigdy tak nie postępuję	2 = często tak postępuję	0 = prawie nigdy tak nie postępuję	2 = często tak postępuję	2 = często tak postępuję	0 = prawie nigdy tak nie postępuję	2 = często tak postępuję	1 = rzadko tak postępuję
2020-12-10 16:59:06	27	1 years		shift (12 hours)	sometimes			in connection without children	bachelor's degree	section nurse	4	4			Yes	Yes			2 = często tak postępuję	3 – raczej tak													2 = często tak postępuję	1 = rzadko tak postępuję	2 = często tak postępuję	1 = rzadko tak postępuję	0 = prawie nigdy tak nie postępuję	3 = prawie zawsze tak postępuję	0 = prawie nigdy tak nie postępuję	2 = często tak postępuję	2 = często tak postępuję	2 = często tak postępuję	2 = często tak postępuję	3 = prawie zawsze tak postępuję	2 = często tak postępuję	1 = rzadko tak postępuję	0 = prawie nigdy tak nie postępuję	3 = prawie zawsze tak postępuję	2 = często tak postępuję
2020-12-10 17:03:04	54	34		single shift	sometimes			single	higher master's degree	independent specialist	4	5			No, I still work in a different workplace	Yes			2 = często tak postępuję	3 – raczej tak													2 = często tak postępuję	2 = często tak postępuję	2 = często tak postępuję	3 = prawie zawsze tak postępuję	1 = rzadko tak postępuję	2 = często tak postępuję	2 = często tak postępuję	1 = rzadko tak postępuję	1 = rzadko tak postępuję	2 = często tak postępuję	1 = rzadko tak postępuję	1 = rzadko tak postępuję	2 = często tak postępuję	2 = często tak postępuję	1 = rzadko tak postępuję	2 = często tak postępuję	1 = rzadko tak postępuję
2020-12-10 17:33:30	49	27		single shift	sometimes			in connection with children	higher master's degree	ward nurse, coordinating nurse	4	4			Yes	Yes			2 = często tak postępuję	4 – tak													3 = prawie zawsze tak postępuję	0 = prawie nigdy tak nie postępuję	0 = prawie nigdy tak nie postępuję	1 = rzadko tak postępuję	0 = prawie nigdy tak nie postępuję	3 = prawie zawsze tak postępuję	0 = prawie nigdy tak nie postępuję	0 = prawie nigdy tak nie postępuję	2 = często tak postępuję	0 = prawie nigdy tak nie postępuję	2 = często tak postępuję	0 = prawie nigdy tak nie postępuję	2 = często tak postępuję	1 = rzadko tak postępuję	0 = prawie nigdy tak nie postępuję	2 = często tak postępuję	0 = prawie nigdy tak nie postępuję
2020-12-10 18:51:29	46	26		single shift	sometimes			single with children	secondary/post-secondary	independent specialist	4	2			Yes	Yes			1 = rzadko tak postępuję	3 – raczej tak													2 = często tak postępuję	1 = rzadko tak postępuję	1 = rzadko tak postępuję	1 = rzadko tak postępuję	1 = rzadko tak postępuję	2 = często tak postępuję	1 = rzadko tak postępuję	1 = rzadko tak postępuję	1 = rzadko tak postępuję	1 = rzadko tak postępuję	2 = często tak postępuję	1 = rzadko tak postępuję	2 = często tak postępuję	0 = prawie nigdy tak nie postępuję	0 = prawie nigdy tak nie postępuję	1 = rzadko tak postępuję	0 = prawie nigdy tak nie postępuję
2020-12-10 19:52:34	23	1,5 years		shift (12 hours)	sometimes			Miss / Bachelor	bachelor's degree	section nurse	3	4			No, I still work in a different workplace	Yes			3 = prawie zawsze tak postępuję	2 – raczej nie													1 = rzadko tak postępuję	1 = rzadko tak postępuję	2 = często tak postępuję	2 = często tak postępuję	2 = często tak postępuję	2 = często tak postępuję	1 = rzadko tak postępuję	2 = często tak postępuję	2 = często tak postępuję	2 = często tak postępuję	2 = często tak postępuję	3 = prawie zawsze tak postępuję	1 = rzadko tak postępuję	2 = często tak postępuję	2 = często tak postępuję	2 = często tak postępuję	2 = często tak postępuję
2020-12-10 20:04:30	58	36		single shift	sometimes			in relation with	higher master's degree	ward nurse, coordinating nurse	4	2			Yes	Yes			2 = często tak postępuję	3 – raczej tak													1 = rzadko tak postępuję	0 = prawie nigdy tak nie postępuję	1 = rzadko tak postępuję	0 = prawie nigdy tak nie postępuję	1 = rzadko tak postępuję	1 = rzadko tak postępuję	0 = prawie nigdy tak nie postępuję	1 = rzadko tak postępuję	1 = rzadko tak postępuję	1 = rzadko tak postępuję	1 = rzadko tak postępuję	0 = prawie nigdy tak nie postępuję	2 = często tak postępuję	0 = prawie nigdy tak nie postępuję	1 = rzadko tak postępuję	0 = prawie nigdy tak nie postępuję	0 = prawie nigdy tak nie postępuję
2020-12-10 20:04:52	24	2,5 years		shift (12 hours)	sometimes			in a relationship, without the children	bachelor's degree	section nurse	5	5			No, I still work in a different workplace	Occasionally			2 = często tak postępuję	3 – raczej tak													2 = często tak postępuję	1 = rzadko tak postępuję	0 = prawie nigdy tak nie postępuję	3 = prawie zawsze tak postępuję	1 = rzadko tak postępuję	2 = często tak postępuję	0 = prawie nigdy tak nie postępuję	2 = często tak postępuję	2 = często tak postępuję	0 = prawie nigdy tak nie postępuję	1 = rzadko tak postępuję	2 = często tak postępuję	2 = często tak postępuję	2 = często tak postępuję	1 = rzadko tak postępuję	1 = rzadko tak postępuję	3 = prawie zawsze tak postępuję
2020-12-10 20:22:42	26	4 years		24-hours	sometimes			Miss / Bachelor	higher master's degree	independent specialist	3	5			No, I still work in a different workplace	Yes			3 = prawie zawsze tak postępuję	2 – raczej nie													2 = często tak postępuję	2 = często tak postępuję	0 = prawie nigdy tak nie postępuję	2 = często tak postępuję	0 = prawie nigdy tak nie postępuję	2 = często tak postępuję	1 = rzadko tak postępuję	1 = rzadko tak postępuję	1 = rzadko tak postępuję	0 = prawie nigdy tak nie postępuję	0 = prawie nigdy tak nie postępuję	2 = często tak postępuję	0 = prawie nigdy tak nie postępuję	2 = często tak postępuję	0 = prawie nigdy tak nie postępuję	1 = rzadko tak postępuję	1 = rzadko tak postępuję
2020-12-10 20:24:59	60	40		single shift	sometimes			in connection with children	secondary/post-secondary	primary care nurse	4	4			Yes	Occasionally			2 = często tak postępuję	3 – raczej tak													2 = często tak postępuję	0 = prawie nigdy tak nie postępuję	0 = prawie nigdy tak nie postępuję	2 = często tak postępuję	1 = rzadko tak postępuję	2 = często tak postępuję	1 = rzadko tak postępuję	2 = często tak postępuję	2 = często tak postępuję	0 = prawie nigdy tak nie postępuję	2 = często tak postępuję	1 = rzadko tak postępuję	2 = często tak postępuję	2 = często tak postępuję	1 = rzadko tak postępuję	2 = często tak postępuję	1 = rzadko tak postępuję
2020-12-10 21:42:35	54	30		shift (12 hours)	sometimes			in connection with children	bachelor's degree	section nurse	5	5			Yes	Yes			2 = często tak postępuję	2 – raczej nie													2 = często tak postępuję	2 = często tak postępuję	0 = prawie nigdy tak nie postępuję	2 = często tak postępuję	1 = rzadko tak postępuję	2 = często tak postępuję	2 = często tak postępuję	2 = często tak postępuję	2 = często tak postępuję	3 = prawie zawsze tak postępuję	1 = rzadko tak postępuję	1 = rzadko tak postępuję	3 = prawie zawsze tak postępuję	2 = często tak postępuję	3 = prawie zawsze tak postępuję	3 = prawie zawsze tak postępuję	3 = prawie zawsze tak postępuję
2020-12-10 21:49:03	55	34		shift (12 hours)	sometimes			in relation with	bachelor's degree	section nurse	3	4			Yes	Yes			1 = rzadko tak postępuję	3 – raczej tak													2 = często tak postępuję	0 = prawie nigdy tak nie postępuję	0 = prawie nigdy tak nie postępuję	2 = często tak postępuję	1 = rzadko tak postępuję	2 = często tak postępuję	0 = prawie nigdy tak nie postępuję	1 = rzadko tak postępuję	2 = często tak postępuję	0 = prawie nigdy tak nie postępuję	2 = często tak postępuję	2 = często tak postępuję	2 = często tak postępuję	2 = często tak postępuję	0 = prawie nigdy tak nie postępuję	2 = często tak postępuję	1 = rzadko tak postępuję
2020-12-10 21:49:42	53	32		single shift	Yes, quite often			in connection with children	doktor	lecturer	2	3			Yes	Yes			2 = często tak postępuję	3 – raczej tak													2 = często tak postępuję	1 = rzadko tak postępuję	1 = rzadko tak postępuję	2 = często tak postępuję	2 = często tak postępuję	2 = często tak postępuję	2 = często tak postępuję	2 = często tak postępuję	1 = rzadko tak postępuję	1 = rzadko tak postępuję	2 = często tak postępuję	2 = często tak postępuję	2 = często tak postępuję	1 = rzadko tak postępuję	1 = rzadko tak postępuję	2 = często tak postępuję	1 = rzadko tak postępuję
2020-12-10 21:50:01	48	26		shift (12 hours)	Czasami			in connection with children	bachelor's degree	section nurse	4	5			Yes	Yes			2 = często tak postępuję	3 – raczej tak													2 = często tak postępuję	1 = rzadko tak postępuję	0 = prawie nigdy tak nie postępuję	2 = często tak postępuję	1 = rzadko tak postępuję	2 = często tak postępuję	0 = prawie nigdy tak nie postępuję	2 = często tak postępuję	2 = często tak postępuję	0 = prawie nigdy tak nie postępuję	2 = często tak postępuję	1 = rzadko tak postępuję	2 = często tak postępuję	2 = często tak postępuję	0 = prawie nigdy tak nie postępuję	1 = rzadko tak postępuję	0 = prawie nigdy tak nie postępuję
2020-12-10 22:29:31	53	29		single shift	Yes, quite often			in relation with	higher master's degree	section nurse	3	3			No, I still work in a different workplace	Occasionally			2 = często tak postępuję	3 – raczej tak													2 = często tak postępuję	1 = rzadko tak postępuję	0 = prawie nigdy tak nie postępuję	2 = często tak postępuję	1 = rzadko tak postępuję	2 = często tak postępuję	1 = rzadko tak postępuję	1 = rzadko tak postępuję	2 = często tak postępuję	0 = prawie nigdy tak nie postępuję	1 = rzadko tak postępuję	2 = często tak postępuję	2 = często tak postępuję	2 = często tak postępuję	1 = rzadko tak postępuję	1 = rzadko tak postępuję	1 = rzadko tak postępuję
2020-12-11 04:30:00	45	10		shift (12 hours)	No			Miss / Bachelor	higher master's degree	section nurse	1	1			Yes	No			2 = często tak postępuję	3 – raczej tak													2 = często tak postępuję	0 = prawie nigdy tak nie postępuję	0 = prawie nigdy tak nie postępuję	1 = rzadko tak postępuję	1 = rzadko tak postępuję	3 = prawie zawsze tak postępuję	0 = prawie nigdy tak nie postępuję	1 = rzadko tak postępuję	1 = rzadko tak postępuję	0 = prawie nigdy tak nie postępuję	2 = często tak postępuję	1 = rzadko tak postępuję	2 = często tak postępuję	1 = rzadko tak postępuję	0 = prawie nigdy tak nie postępuję	2 = często tak postępuję	1 = rzadko tak postępuję
2020-12-11 07:41:34	51	30		single shift	Yes, quite often			in connection with children	higher master's degree	ward nurse, coordinating nurse	5	4			Contract work	Yes			1 = rzadko tak postępuję	2 – raczej nie													2 = często tak postępuję	1 = rzadko tak postępuję	0 = prawie nigdy tak nie postępuję	2 = często tak postępuję	0 = prawie nigdy tak nie postępuję	2 = często tak postępuję	0 = prawie nigdy tak nie postępuję	1 = rzadko tak postępuję	2 = często tak postępuję	0 = prawie nigdy tak nie postępuję	3 = prawie zawsze tak postępuję	1 = rzadko tak postępuję	2 = często tak postępuję	2 = często tak postępuję	1 = rzadko tak postępuję	2 = często tak postępuję	2 = często tak postępuję
2020-12-11 08:31:06	51	32		single shift	No			in connection with children	higher master's degree	independent specialist	4	3			No, I still work in a different workplace	Nie			1 = rzadko tak postępuję	2 – raczej nie													2 = często tak postępuję	1 = rzadko tak postępuję	2 = często tak postępuję	1 = rzadko tak postępuję	1 = rzadko tak postępuję	2 = często tak postępuję	2 = często tak postępuję	2 = często tak postępuję	2 = często tak postępuję	2 = często tak postępuję	2 = często tak postępuję	2 = często tak postępuję	2 = często tak postępuję	1 = rzadko tak postępuję	2 = często tak postępuję	1 = rzadko tak postępuję	0 = prawie nigdy tak nie postępuję
2020-12-11 08:52:55	54	33 years		single shift	Yes, quite often			in relation with	higher master's degree	ward nurse, coordinating nurse	3	3			Yes	Yes			3 = prawie zawsze tak postępuję	4 – tak													3 = prawie zawsze tak postępuję	0 = prawie nigdy tak nie postępuję	0 = prawie nigdy tak nie postępuję	2 = często tak postępuję	0 = prawie nigdy tak nie postępuję	3 = prawie zawsze tak postępuję	0 = prawie nigdy tak nie postępuję	2 = często tak postępuję	0 = prawie nigdy tak nie postępuję	0 = prawie nigdy tak nie postępuję	3 = prawie zawsze tak postępuję	0 = prawie nigdy tak nie postępuję	3 = prawie zawsze tak postępuję	2 = często tak postępuję	0 = prawie nigdy tak nie postępuję	3 = prawie zawsze tak postępuję	0 = prawie nigdy tak nie postępuję
2020-12-11 08:56:21	48	27		single shift	No			in connection with children	higher master's degree	independent specialist	4	5			No, I still work in a different workplace	Occasionally			2 = często tak postępuję	3 – raczej tak													2 = często tak postępuję	2 = często tak postępuję	0 = prawie nigdy tak nie postępuję	2 = często tak postępuję	0 = prawie nigdy tak nie postępuję	2 = często tak postępuję	2 = często tak postępuję	2 = często tak postępuję	2 = często tak postępuję	0 = prawie nigdy tak nie postępuję	2 = często tak postępuję	2 = często tak postępuję	2 = często tak postępuję	2 = często tak postępuję	1 = rzadko tak postępuję	2 = często tak postępuję	0 = prawie nigdy tak nie postępuję
2020-12-11 09:08:18	47	17		single shift	No			in relation with	bachelor's degree	primary care nurse	4	4			No, I still work in a different workplace	Tak			2 = często tak postępuję	3 – raczej tak													2 = często tak postępuję	0 = prawie nigdy tak nie postępuję	0 = prawie nigdy tak nie postępuję	3 = prawie zawsze tak postępuję	1 = rzadko tak postępuję	2 = często tak postępuję	1 = rzadko tak postępuję	1 = rzadko tak postępuję	2 = często tak postępuję	0 = prawie nigdy tak nie postępuję	2 = często tak postępuję	1 = rzadko tak postępuję	2 = często tak postępuję	3 = prawie zawsze tak postępuję	1 = rzadko tak postępuję	2 = często tak postępuję	2 = często tak postępuję
2020-12-11 09:32:06	38	15 years		shift (12 hours)	sometimes			in connection with children	higher master's degree	section nurse	4	3			Yes	Occasionally			3 = prawie zawsze tak postępuję	3 – raczej tak													2 = często tak postępuję	0 = prawie nigdy tak nie postępuję	1 = rzadko tak postępuję	3 = prawie zawsze tak postępuję	0 = prawie nigdy tak nie postępuję	0 = prawie nigdy tak nie postępuję	2 = często tak postępuję	1 = rzadko tak postępuję	3 = prawie zawsze tak postępuję	0 = prawie nigdy tak nie postępuję	1 = rzadko tak postępuję	1 = rzadko tak postępuję	1 = rzadko tak postępuję	1 = rzadko tak postępuję	1 = rzadko tak postępuję	2 = często tak postępuję	1 = rzadko tak postępuję
2020-12-11 10:16:33	52	32		single shift	sometimes			in relation with	higher master's degree	ward nurse, coordinating nurse	4	3			No, I still work in a different workplace	Yes			1 = rzadko tak postępuję	3 – raczej tak													3 = prawie zawsze tak postępuję	0 = prawie nigdy tak nie postępuję	0 = prawie nigdy tak nie postępuję	1 = rzadko tak postępuję	0 = prawie nigdy tak nie postępuję	3 = prawie zawsze tak postępuję	0 = prawie nigdy tak nie postępuję	0 = prawie nigdy tak nie postępuję	2 = często tak postępuję	0 = prawie nigdy tak nie postępuję	3 = prawie zawsze tak postępuję	0 = prawie nigdy tak nie postępuję	3 = prawie zawsze tak postępuję	2 = często tak postępuję	0 = prawie nigdy tak nie postępuję	3 = prawie zawsze tak postępuję	0 = prawie nigdy tak nie postępuję
2020-12-11 10:25:30	55	35		single shift	sometimes			in connection with children	higher master's degree	ward nurse, coordinating nurse	4	4			Yes	Yes			2 = często tak postępuję	3 – raczej tak													2 = często tak postępuję	2 = często tak postępuję	2 = często tak postępuję	2 = często tak postępuję	1 = rzadko tak postępuję	2 = często tak postępuję	1 = rzadko tak postępuję	1 = rzadko tak postępuję	2 = często tak postępuję	2 = często tak postępuję	2 = często tak postępuję	2 = często tak postępuję	2 = często tak postępuję	2 = często tak postępuję	0 = prawie nigdy tak nie postępuję	2 = często tak postępuję	2 = często tak postępuję
2020-12-11 12:46:01	23	1		24-godziny	sometimes			in a relationship, without the children	bachelor's degree	independent specialist	4	5			Yes	Yes			3 = prawie zawsze tak postępuję	3 – raczej tak													3 = prawie zawsze tak postępuję	0 = prawie nigdy tak nie postępuję	0 = prawie nigdy tak nie postępuję	3 = prawie zawsze tak postępuję	0 = prawie nigdy tak nie postępuję	3 = prawie zawsze tak postępuję	1 = rzadko tak postępuję	2 = często tak postępuję	1 = rzadko tak postępuję	0 = prawie nigdy tak nie postępuję	1 = rzadko tak postępuję	2 = często tak postępuję	2 = często tak postępuję	2 = często tak postępuję	0 = prawie nigdy tak nie postępuję	2 = często tak postępuję	2 = często tak postępuję
2020-12-11 13:17:39	23	1,5 years		shift (12 hours)	No			in relation with	bachelor's degree	section nurse	2	5			Yes	Occasionally			0 = prawie nigdy tak nie postępuję	3 – raczej tak													2 = często tak postępuję	1 = rzadko tak postępuję	0 = prawie nigdy tak nie postępuję	3 = prawie zawsze tak postępuję	1 = rzadko tak postępuję	2 = często tak postępuję	1 = rzadko tak postępuję	2 = często tak postępuję	2 = często tak postępuję	0 = prawie nigdy tak nie postępuję	2 = często tak postępuję	2 = często tak postępuję	3 = prawie zawsze tak postępuję	3 = prawie zawsze tak postępuję	0 = prawie nigdy tak nie postępuję	2 = często tak postępuję	2 = często tak postępuję
2020-12-12 17:30:47	49	25 years		shift (12 hours)	sometimes			in connection with children	bachelor's degree	section nurse	4	3			No, I still work in a different workplace	Occasionally			2 = często tak postępuję	3 – raczej tak													2 = często tak postępuję	1 = rzadko tak postępuję	0 = prawie nigdy tak nie postępuję	1 = rzadko tak postępuję	1 = rzadko tak postępuję	2 = często tak postępuję	1 = rzadko tak postępuję	2 = często tak postępuję	0 = prawie nigdy tak nie postępuję	0 = prawie nigdy tak nie postępuję	1 = rzadko tak postępuję	2 = często tak postępuję	1 = rzadko tak postępuję	1 = rzadko tak postępuję	1 = rzadko tak postępuję	2 = często tak postępuję	2 = często tak postępuję
2020-12-12 20:17:26	50	30 years		shift (12 hours)	sometimes			in connection with children	higher master's degree	ward nurse, coordinating nurse	4	4			No, I still work in a different workplace	No			3 = prawie zawsze tak postępuję	4 – tak													3 = prawie zawsze tak postępuję	1 = rzadko tak postępuję	1 = rzadko tak postępuję	2 = często tak postępuję	0 = prawie nigdy tak nie postępuję	3 = prawie zawsze tak postępuję	0 = prawie nigdy tak nie postępuję	0 = prawie nigdy tak nie postępuję	1 = rzadko tak postępuję	1 = rzadko tak postępuję	2 = często tak postępuję	3 = prawie zawsze tak postępuję	3 = prawie zawsze tak postępuję	2 = często tak postępuję	0 = prawie nigdy tak nie postępuję	2 = często tak postępuję	1 = rzadko tak postępuję
2020-12-12 21:30:21	43	22		single shift	sometimes			in connection with children	higher master's degree	independent specialist	4	2			No, I still work in a different workplace	Yes			1 = rzadko tak postępuję	3 – raczej tak													0 = prawie nigdy tak nie postępuję	0 = prawie nigdy tak nie postępuję	0 = prawie nigdy tak nie postępuję	1 = rzadko tak postępuję	0 = prawie nigdy tak nie postępuję	2 = często tak postępuję	0 = prawie nigdy tak nie postępuję	2 = często tak postępuję	2 = często tak postępuję	0 = prawie nigdy tak nie postępuję	3 = prawie zawsze tak postępuję	1 = rzadko tak postępuję	3 = prawie zawsze tak postępuję	2 = często tak postępuję	0 = prawie nigdy tak nie postępuję	3 = prawie zawsze tak postępuję	2 = często tak postępuję
2020-12-13 08:23:33	52	32		single shift	No			single, with children	higher master's degree	ward nurse, coordinating nurse	4	4			Yes	Yes			1 = rzadko tak postępuję	3 – raczej tak													3 = prawie zawsze tak postępuję	0 = prawie nigdy tak nie postępuję	1 = rzadko tak postępuję	1 = rzadko tak postępuję	0 = prawie nigdy tak nie postępuję	3 = prawie zawsze tak postępuję	0 = prawie nigdy tak nie postępuję	1 = rzadko tak postępuję	2 = często tak postępuję	1 = rzadko tak postępuję	1 = rzadko tak postępuję	1 = rzadko tak postępuję	2 = często tak postępuję	2 = często tak postępuję	0 = prawie nigdy tak nie postępuję	1 = rzadko tak postępuję	1 = rzadko tak postępuję
2020-12-13 08:29:13	62	40		single shift	No			in relation with	bachelor's degree	ward nurse, coordinating nurse	4	4			Yes	Yes			2 = często tak postępuję	3 – raczej tak													2 = często tak postępuję	1 = rzadko tak postępuję	0 = prawie nigdy tak nie postępuję	2 = często tak postępuję	1 = rzadko tak postępuję	2 = często tak postępuję	1 = rzadko tak postępuję	2 = często tak postępuję	2 = często tak postępuję	0 = prawie nigdy tak nie postępuję	2 = często tak postępuję	1 = rzadko tak postępuję	2 = często tak postępuję	2 = często tak postępuję	1 = rzadko tak postępuję	2 = często tak postępuję	2 = często tak postępuję
2020-12-13 09:00:42	25	2 years		single shift	sometimes			in relation with	higher master's degree	primary care nurse	4	4			Yes	Yes			1 = rzadko tak postępuję	3 – raczej tak													3 = prawie zawsze tak postępuję	0 = prawie nigdy tak nie postępuję	0 = prawie nigdy tak nie postępuję	2 = często tak postępuję	1 = rzadko tak postępuję	2 = często tak postępuję	0 = prawie nigdy tak nie postępuję	1 = rzadko tak postępuję	3 = prawie zawsze tak postępuję	0 = prawie nigdy tak nie postępuję	1 = rzadko tak postępuję	2 = często tak postępuję	2 = często tak postępuję	2 = często tak postępuję	1 = rzadko tak postępuję	1 = rzadko tak postępuję	1 = rzadko tak postępuję
2020-12-13 11:24:41	43	16		shift 7.35h	sometimes			in connection with children	bachelor's degree	primary care nurse	4	4			Yes	Yes			3 = prawie zawsze tak postępuję	3 – raczej tak													2 = często tak postępuję	1 = rzadko tak postępuję	0 = prawie nigdy tak nie postępuję	1 = rzadko tak postępuję	1 = rzadko tak postępuję	2 = często tak postępuję	1 = rzadko tak postępuję	2 = często tak postępuję	2 = często tak postępuję	0 = prawie nigdy tak nie postępuję	2 = często tak postępuję	1 = rzadko tak postępuję	2 = często tak postępuję	2 = często tak postępuję	1 = rzadko tak postępuję	2 = często tak postępuję	2 = często tak postępuję
2020-12-13 11:24:43	49	28		two-shift	sometimes			in relation with	bachelor's degree	primary care nurse	3	3			No, I still work in a different workplace	No			3 = prawie zawsze tak postępuję	3 – raczej tak													3 = prawie zawsze tak postępuję	0 = prawie nigdy tak nie postępuję	1 = rzadko tak postępuję	1 = rzadko tak postępuję	0 = prawie nigdy tak nie postępuję	2 = często tak postępuję	1 = rzadko tak postępuję	1 = rzadko tak postępuję	1 = rzadko tak postępuję	1 = rzadko tak postępuję	2 = często tak postępuję	2 = często tak postępuję	3 = prawie zawsze tak postępuję	1 = rzadko tak postępuję	1 = rzadko tak postępuję	2 = często tak postępuję	2 = często tak postępuję
2020-12-13 11:26:07	48	25		single shift	sometimes			in connection with children	bachelor's degree	primary care nurse	4	4			Yes	Yes			0 = prawie nigdy tak nie postępuję	3 – raczej tak													2 = często tak postępuję	1 = rzadko tak postępuję	0 = prawie nigdy tak nie postępuję	2 = często tak postępuję	1 = rzadko tak postępuję	2 = często tak postępuję	1 = rzadko tak postępuję	1 = rzadko tak postępuję	2 = często tak postępuję	0 = prawie nigdy tak nie postępuję	2 = często tak postępuję	1 = rzadko tak postępuję	2 = często tak postępuję	2 = często tak postępuję	1 = rzadko tak postępuję	2 = często tak postępuję	2 = często tak postępuję
2020-12-13 11:27:38	32	11		single shift	No			in connection without children	higher master's degree	ward nurse, coordinating nurse	3	3			Yes	Yes			2 = często tak postępuję	3 – raczej tak													2 = często tak postępuję	2 = często tak postępuję	0 = prawie nigdy tak nie postępuję	3 = prawie zawsze tak postępuję	0 = prawie nigdy tak nie postępuję	3 = prawie zawsze tak postępuję	3 = prawie zawsze tak postępuję	3 = prawie zawsze tak postępuję	3 = prawie zawsze tak postępuję	0 = prawie nigdy tak nie postępuję	3 = prawie zawsze tak postępuję	1 = rzadko tak postępuję	1 = rzadko tak postępuję	3 = prawie zawsze tak postępuję	0 = prawie nigdy tak nie postępuję	3 = prawie zawsze tak postępuję	2 = często tak postępuję
2020-12-13 11:36:35	62	42		single shift	No			in relation with	bachelor's degree	primary care nurse	4	4			Yes	Yes			2 = często tak postępuję	2 – raczej nie													1 = rzadko tak postępuję	1 = rzadko tak postępuję	1 = rzadko tak postępuję	1 = rzadko tak postępuję	2 = często tak postępuję	1 = rzadko tak postępuję	2 = często tak postępuję	1 = rzadko tak postępuję	2 = często tak postępuję	1 = rzadko tak postępuję	1 = rzadko tak postępuję	2 = często tak postępuję	1 = rzadko tak postępuję	1 = rzadko tak postępuję	1 = rzadko tak postępuję	1 = rzadko tak postępuję	1 = rzadko tak postępuję
2020-12-13 11:36:45	34	10		single shift	Yes, quite often			in connection with children	higher master's degree	ward nurse, coordinating nurse	3	5			No, I still work in a different workplace	Yes			1 = rzadko tak postępuję	2 – raczej nie													3 = prawie zawsze tak postępuję	0 = prawie nigdy tak nie postępuję	0 = prawie nigdy tak nie postępuję	3 = prawie zawsze tak postępuję	1 = rzadko tak postępuję	3 = prawie zawsze tak postępuję	1 = rzadko tak postępuję	0 = prawie nigdy tak nie postępuję	2 = często tak postępuję	0 = prawie nigdy tak nie postępuję	2 = często tak postępuję	2 = często tak postępuję	3 = prawie zawsze tak postępuję	3 = prawie zawsze tak postępuję	0 = prawie nigdy tak nie postępuję	2 = często tak postępuję	1 = rzadko tak postępuję
2020-12-13 11:42:45	31	9 years		single shift	sometimes			in a relationship, without the children	bachelor's degree	primary care nurse	5	5			No, I still work in a different workplace	Occasionally			3 = prawie zawsze tak postępuję	3 – raczej tak													2 = często tak postępuję	0 = prawie nigdy tak nie postępuję	1 = rzadko tak postępuję	2 = często tak postępuję	1 = rzadko tak postępuję	2 = często tak postępuję	1 = rzadko tak postępuję	1 = rzadko tak postępuję	3 = prawie zawsze tak postępuję	1 = rzadko tak postępuję	1 = rzadko tak postępuję	3 = prawie zawsze tak postępuję	2 = często tak postępuję	3 = prawie zawsze tak postępuję	0 = prawie nigdy tak nie postępuję	0 = prawie nigdy tak nie postępuję	3 = prawie zawsze tak postępuję
2020-12-13 11:48:48	31	8		single shift	Yes, quite often			in connection with children	higher master's degree	primary care nurse	4	4			No, I still work in a different workplace	Occasionally			1 = rzadko tak postępuję	3 – raczej tak													2 = często tak postępuję	0 = prawie nigdy tak nie postępuję	0 = prawie nigdy tak nie postępuję	1 = rzadko tak postępuję	1 = rzadko tak postępuję	1 = rzadko tak postępuję	1 = rzadko tak postępuję	1 = rzadko tak postępuję	1 = rzadko tak postępuję	0 = prawie nigdy tak nie postępuję	1 = rzadko tak postępuję	1 = rzadko tak postępuję	2 = często tak postępuję	1 = rzadko tak postępuję	1 = rzadko tak postępuję	1 = rzadko tak postępuję	1 = rzadko tak postępuję
2020-12-13 11:51:31	45	20 years		single shift	No			in connection with children	higher master's degree	primary care nurse	4	4			Yes	Yes			2 = często tak postępuję	3 – raczej tak													2 = często tak postępuję	0 = prawie nigdy tak nie postępuję	0 = prawie nigdy tak nie postępuję	2 = często tak postępuję	1 = rzadko tak postępuję	3 = prawie zawsze tak postępuję	1 = rzadko tak postępuję	1 = rzadko tak postępuję	2 = często tak postępuję	0 = prawie nigdy tak nie postępuję	2 = często tak postępuję	2 = często tak postępuję	3 = prawie zawsze tak postępuję	2 = często tak postępuję	0 = prawie nigdy tak nie postępuję	1 = rzadko tak postępuję	1 = rzadko tak postępuję
2020-12-13 11:56:15	54	34		single shift	No			in relation with	bachelor's degree	primary care nurse	4	3			No, I still work in a different workplace	Occasionally			2 = często tak postępuję	3 – raczej tak													2 = często tak postępuję	0 = prawie nigdy tak nie postępuję	0 = prawie nigdy tak nie postępuję	0 = prawie nigdy tak nie postępuję	1 = rzadko tak postępuję	2 = często tak postępuję	1 = rzadko tak postępuję	2 = często tak postępuję	2 = często tak postępuję	0 = prawie nigdy tak nie postępuję	1 = rzadko tak postępuję	2 = często tak postępuję	2 = często tak postępuję	0 = prawie nigdy tak nie postępuję	1 = rzadko tak postępuję	2 = często tak postępuję	1 = rzadko tak postępuję
2020-12-13 12:05:46	45	20		two-shift	No			in connection with children	higher master's degree	primary care nurse	3	4			Yes	Yes			1 = rzadko tak postępuję	3 – raczej tak													2 = często tak postępuję	0 = prawie nigdy tak nie postępuję	0 = prawie nigdy tak nie postępuję	1 = rzadko tak postępuję	0 = prawie nigdy tak nie postępuję	3 = prawie zawsze tak postępuję	1 = rzadko tak postępuję	2 = często tak postępuję	2 = często tak postępuję	0 = prawie nigdy tak nie postępuję	1 = rzadko tak postępuję	0 = prawie nigdy tak nie postępuję	2 = często tak postępuję	0 = prawie nigdy tak nie postępuję	1 = rzadko tak postępuję	1 = rzadko tak postępuję	0 = prawie nigdy tak nie postępuję
2020-12-13 12:06:05	46	17		single shift	No			in relation with	higher master's degree	primary care nurse	5	4			Yes	Yes			3 = prawie zawsze tak postępuję	3 – raczej tak													2 = często tak postępuję	1 = rzadko tak postępuję	0 = prawie nigdy tak nie postępuję	1 = rzadko tak postępuję	1 = rzadko tak postępuję	2 = często tak postępuję	0 = prawie nigdy tak nie postępuję	1 = rzadko tak postępuję	1 = rzadko tak postępuję	0 = prawie nigdy tak nie postępuję	2 = często tak postępuję	2 = często tak postępuję	2 = często tak postępuję	2 = często tak postępuję	1 = rzadko tak postępuję	1 = rzadko tak postępuję	2 = często tak postępuję
2020-12-13 12:13:58	56	36 years		single shift	No			in relation with	secondary/post-secondary	primary care nurse	3	5			Yes	Occasionally			1 = rzadko tak postępuję	3 – raczej tak													2 = często tak postępuję	1 = rzadko tak postępuję	0 = prawie nigdy tak nie postępuję	1 = rzadko tak postępuję	0 = prawie nigdy tak nie postępuję	2 = często tak postępuję	1 = rzadko tak postępuję	1 = rzadko tak postępuję	1 = rzadko tak postępuję	0 = prawie nigdy tak nie postępuję	2 = często tak postępuję	2 = często tak postępuję	2 = często tak postępuję	2 = często tak postępuję	2 = często tak postępuję	2 = często tak postępuję	0 = prawie nigdy tak nie postępuję
2020-12-13 12:35:08	56	35		single shift	Yes, quite often			single	higher master's degree	ward nurse, coordinating nurse	5	4			Yes	Yes			1 = rzadko tak postępuję	3 – raczej tak													3 = prawie zawsze tak postępuję	1 = rzadko tak postępuję	0 = prawie nigdy tak nie postępuję	1 = rzadko tak postępuję	1 = rzadko tak postępuję	3 = prawie zawsze tak postępuję	2 = często tak postępuję	0 = prawie nigdy tak nie postępuję	2 = często tak postępuję	0 = prawie nigdy tak nie postępuję	2 = często tak postępuję	2 = często tak postępuję	2 = często tak postępuję	2 = często tak postępuję	1 = rzadko tak postępuję	1 = rzadko tak postępuję	1 = rzadko tak postępuję
2020-12-13 12:35:27	47	17		single shift	Nie			in connection with children	bachelor's degree	primary care nurse	3	3			Yes	Yes			1 = rzadko tak postępuję	3 – raczej tak													2 = często tak postępuję	1 = rzadko tak postępuję	1 = rzadko tak postępuję	0 = prawie nigdy tak nie postępuję	2 = często tak postępuję	2 = często tak postępuję	2 = często tak postępuję	2 = często tak postępuję	2 = często tak postępuję	1 = rzadko tak postępuję	1 = rzadko tak postępuję	2 = często tak postępuję	2 = często tak postępuję	0 = prawie nigdy tak nie postępuję	2 = często tak postępuję	1 = rzadko tak postępuję	2 = często tak postępuję
2020-12-13 12:57:33	49	28		single shift	sometimes			in connection with children	higher master's degree	primary care nurse	3	3			No, I still work in a different workplace	Occasionally			3 = prawie zawsze tak postępuję	3 – raczej tak													2 = często tak postępuję	0 = prawie nigdy tak nie postępuję	1 = rzadko tak postępuję	3 = prawie zawsze tak postępuję	1 = rzadko tak postępuję	3 = prawie zawsze tak postępuję	1 = rzadko tak postępuję	1 = rzadko tak postępuję	3 = prawie zawsze tak postępuję	1 = rzadko tak postępuję	2 = często tak postępuję	2 = często tak postępuję	2 = często tak postępuję	3 = prawie zawsze tak postępuję	0 = prawie nigdy tak nie postępuję	3 = prawie zawsze tak postępuję	2 = często tak postępuję
2020-12-13 13:09:17	43	19 years		single shift	No			in relation with	bachelor's degree	primary care nurse	4	5			Yes	Yes			2 = często tak postępuję	3 – raczej tak													2 = często tak postępuję	1 = rzadko tak postępuję	0 = prawie nigdy tak nie postępuję	2 = często tak postępuję	0 = prawie nigdy tak nie postępuję	3 = prawie zawsze tak postępuję	0 = prawie nigdy tak nie postępuję	1 = rzadko tak postępuję	2 = często tak postępuję	0 = prawie nigdy tak nie postępuję	3 = prawie zawsze tak postępuję	1 = rzadko tak postępuję	2 = często tak postępuję	2 = często tak postępuję	0 = prawie nigdy tak nie postępuję	3 = prawie zawsze tak postępuję	2 = często tak postępuję
2020-12-13 13:22:36	51	30		single shift	sometimes			in relation with	bachelor's degree	primary care nurse	4	3			No, I still work in a different workplace	Yes			2 = często tak postępuję	3 – raczej tak													2 = często tak postępuję	1 = rzadko tak postępuję	1 = rzadko tak postępuję	2 = często tak postępuję	1 = rzadko tak postępuję	2 = często tak postępuję	2 = często tak postępuję	2 = często tak postępuję	3 = prawie zawsze tak postępuję	1 = rzadko tak postępuję	2 = często tak postępuję	2 = często tak postępuję	3 = prawie zawsze tak postępuję	2 = często tak postępuję	0 = prawie nigdy tak nie postępuję	2 = często tak postępuję	2 = często tak postępuję
2020-12-13 13:33:11	49	25		shift (12 hours)	No			single, with children	bachelor's degree	section nurse	4	2			No, I still work in a different workplace	Yes			2 = często tak postępuję	3 – raczej tak													3 = prawie zawsze tak postępuję	1 = rzadko tak postępuję	0 = prawie nigdy tak nie postępuję	3 = prawie zawsze tak postępuję	1 = rzadko tak postępuję	3 = prawie zawsze tak postępuję	2 = często tak postępuję	1 = rzadko tak postępuję	3 = prawie zawsze tak postępuję	0 = prawie nigdy tak nie postępuję	2 = często tak postępuję	2 = często tak postępuję	2 = często tak postępuję	2 = często tak postępuję	0 = prawie nigdy tak nie postępuję	3 = prawie zawsze tak postępuję	1 = rzadko tak postępuję
2020-12-13 13:37:51	53	32		two shifts	sometimes			Miss / Bachelor	bachelor's degree	ward nurse, coordinating nurse	3	5			Yes	Yes			2 = często tak postępuję	3 – raczej tak													2 = często tak postępuję	2 = często tak postępuję	1 = rzadko tak postępuję	1 = rzadko tak postępuję	1 = rzadko tak postępuję	2 = często tak postępuję	1 = rzadko tak postępuję	1 = rzadko tak postępuję	1 = rzadko tak postępuję	0 = prawie nigdy tak nie postępuję	1 = rzadko tak postępuję	1 = rzadko tak postępuję	2 = często tak postępuję	2 = często tak postępuję	1 = rzadko tak postępuję	2 = często tak postępuję	1 = rzadko tak postępuję
2020-12-13 13:42:41	48	28		two shifts	No			in relation with	bachelor's degree	primary care nurse	3	3			No, I still work in a different workplace	Occasionally			2 = często tak postępuję	3 – raczej tak													3 = prawie zawsze tak postępuję	1 = rzadko tak postępuję	1 = rzadko tak postępuję	2 = często tak postępuję	1 = rzadko tak postępuję	2 = często tak postępuję	1 = rzadko tak postępuję	2 = często tak postępuję	2 = często tak postępuję	1 = rzadko tak postępuję	1 = rzadko tak postępuję	2 = często tak postępuję	2 = często tak postępuję	2 = często tak postępuję	1 = rzadko tak postępuję	1 = rzadko tak postępuję	1 = rzadko tak postępuję
2020-12-13 13:44:37	37	15 years		single shift	No			Miss / Bachelor	bachelor's degree	primary care nurse	3	4			I work on a contract	Tak			3 = prawie zawsze tak postępuję	3 – raczej tak													2 = często tak postępuję	1 = rzadko tak postępuję	0 = prawie nigdy tak nie postępuję	2 = często tak postępuję	1 = rzadko tak postępuję	3 = prawie zawsze tak postępuję	0 = prawie nigdy tak nie postępuję	2 = często tak postępuję	2 = często tak postępuję	0 = prawie nigdy tak nie postępuję	3 = prawie zawsze tak postępuję	1 = rzadko tak postępuję	3 = prawie zawsze tak postępuję	2 = często tak postępuję	1 = rzadko tak postępuję	3 = prawie zawsze tak postępuję	2 = często tak postępuję
2020-12-13 13:45:59	66	45 years		shift (12 hours)	sometimes			in relation with	secondary/post-secondary	section nurse	4	4			Yes	Occasionally			1 = rzadko tak postępuję	3 – raczej tak													2 = często tak postępuję	1 = rzadko tak postępuję	1 = rzadko tak postępuję	1 = rzadko tak postępuję	1 = rzadko tak postępuję	2 = często tak postępuję	2 = często tak postępuję	0 = prawie nigdy tak nie postępuję	3 = prawie zawsze tak postępuję	0 = prawie nigdy tak nie postępuję	2 = często tak postępuję	0 = prawie nigdy tak nie postępuję	3 = prawie zawsze tak postępuję	2 = często tak postępuję	1 = rzadko tak postępuję	3 = prawie zawsze tak postępuję	0 = prawie nigdy tak nie postępuję
2020-12-13 14:03:26	31	2 years		single shift	Yes, quite often			in connection with children	bachelor's degree	ward nurse, coordinating nurse	4	2			Yes	No			2 = często tak postępuję	3 – raczej tak													2 = często tak postępuję	1 = rzadko tak postępuję	0 = prawie nigdy tak nie postępuję	1 = rzadko tak postępuję	1 = rzadko tak postępuję	3 = prawie zawsze tak postępuję	1 = rzadko tak postępuję	2 = często tak postępuję	1 = rzadko tak postępuję	0 = prawie nigdy tak nie postępuję	2 = często tak postępuję	1 = rzadko tak postępuję	2 = często tak postępuję	1 = rzadko tak postępuję	1 = rzadko tak postępuję	1 = rzadko tak postępuję	1 = rzadko tak postępuję
2020-12-13 14:04:38	50	20		single shift	No			in connection with children	bachelor's degree	primary care nurse	4	5			Yes	Yes			2 = często tak postępuję	2 – raczej nie													2 = często tak postępuję	1 = rzadko tak postępuję	0 = prawie nigdy tak nie postępuję	2 = często tak postępuję	1 = rzadko tak postępuję	3 = prawie zawsze tak postępuję	1 = rzadko tak postępuję	2 = często tak postępuję	2 = często tak postępuję	0 = prawie nigdy tak nie postępuję	2 = często tak postępuję	3 = prawie zawsze tak postępuję	2 = często tak postępuję	2 = często tak postępuję	0 = prawie nigdy tak nie postępuję	2 = często tak postępuję	1 = rzadko tak postępuję
2020-12-13 14:06:13	51	31		single shift	sometimes			in connection without children	bachelor's degree	independent specialist	4	5			I work on a contract	Yes			2 = często tak postępuję	4 – tak													2 = często tak postępuję	1 = rzadko tak postępuję	1 = rzadko tak postępuję	3 = prawie zawsze tak postępuję	1 = rzadko tak postępuję	3 = prawie zawsze tak postępuję	2 = często tak postępuję	2 = często tak postępuję	2 = często tak postępuję	1 = rzadko tak postępuję	2 = często tak postępuję	1 = rzadko tak postępuję	2 = często tak postępuję	3 = prawie zawsze tak postępuję	1 = rzadko tak postępuję	2 = często tak postępuję	2 = często tak postępuję
2020-12-13 14:07:53	57	37		single shift	No			in relation with	higher master's degree	independent specialist	4	4			No, I still work in a different workplace	Yes			2 = często tak postępuję	3 – raczej tak													2 = często tak postępuję	0 = prawie nigdy tak nie postępuję	0 = prawie nigdy tak nie postępuję	1 = rzadko tak postępuję	1 = rzadko tak postępuję	2 = często tak postępuję	0 = prawie nigdy tak nie postępuję	2 = często tak postępuję	1 = rzadko tak postępuję	0 = prawie nigdy tak nie postępuję	2 = często tak postępuję	2 = często tak postępuję	2 = często tak postępuję	1 = rzadko tak postępuję	0 = prawie nigdy tak nie postępuję	1 = rzadko tak postępuję	0 = prawie nigdy tak nie postępuję
2020-12-13 14:13:25	46	26		single shift	No			in relation with	higher master's degree	primary care nurse	4	4			Yes	Yes			1 = rzadko tak postępuję	3 – raczej tak													2 = często tak postępuję	1 = rzadko tak postępuję	0 = prawie nigdy tak nie postępuję	2 = często tak postępuję	1 = rzadko tak postępuję	2 = często tak postępuję	1 = rzadko tak postępuję	1 = rzadko tak postępuję	2 = często tak postępuję	0 = prawie nigdy tak nie postępuję	3 = prawie zawsze tak postępuję	1 = rzadko tak postępuję	2 = często tak postępuję	2 = często tak postępuję	1 = rzadko tak postępuję	3 = prawie zawsze tak postępuję	1 = rzadko tak postępuję
2020-12-13 14:17:48	53	33 years		single shift	sometimes			in relation with	secondary/post-secondary	ward nurse, coordinating nurse	2	3			No, I still work in a different workplace	Yes			0 = prawie nigdy tak nie postępuję	4 – tak													2 = często tak postępuję	1 = rzadko tak postępuję	1 = rzadko tak postępuję	2 = często tak postępuję	0 = prawie nigdy tak nie postępuję	3 = prawie zawsze tak postępuję	1 = rzadko tak postępuję	2 = często tak postępuję	3 = prawie zawsze tak postępuję	1 = rzadko tak postępuję	3 = prawie zawsze tak postępuję	3 = prawie zawsze tak postępuję	3 = prawie zawsze tak postępuję	2 = często tak postępuję	0 = prawie nigdy tak nie postępuję	3 = prawie zawsze tak postępuję	2 = często tak postępuję
2020-12-13 14:28:51	47	23		single shift	Yes, quite often			in connection with children	higher master's degree	managing nurse	4	2			Yes	Yes			2 = często tak postępuję	3 – raczej tak													2 = często tak postępuję	1 = rzadko tak postępuję	0 = prawie nigdy tak nie postępuję	1 = rzadko tak postępuję	2 = często tak postępuję	2 = często tak postępuję	2 = często tak postępuję	2 = często tak postępuję	2 = często tak postępuję	0 = prawie nigdy tak nie postępuję	1 = rzadko tak postępuję	2 = często tak postępuję	3 = prawie zawsze tak postępuję	1 = rzadko tak postępuję	1 = rzadko tak postępuję	2 = często tak postępuję	1 = rzadko tak postępuję
2020-12-13 14:30:38	27	6		shift (7,35 h)	Yes, quite often			in relation with	higher master's degree	managing nurse	3	3			Yes	Occasionally			1 = rzadko tak postępuję	3 – raczej tak													1 = rzadko tak postępuję	0 = prawie nigdy tak nie postępuję	0 = prawie nigdy tak nie postępuję	1 = rzadko tak postępuję	1 = rzadko tak postępuję	2 = często tak postępuję	0 = prawie nigdy tak nie postępuję	2 = często tak postępuję	1 = rzadko tak postępuję	0 = prawie nigdy tak nie postępuję	2 = często tak postępuję	1 = rzadko tak postępuję	2 = często tak postępuję	1 = rzadko tak postępuję	1 = rzadko tak postępuję	1 = rzadko tak postępuję	0 = prawie nigdy tak nie postępuję
2020-12-13 14:35:36	52	32		single shift	sometimes			in relation with	bachelor's degree	primary care nurse	4	3			Yes	Occasionally			2 = często tak postępuję	2 – raczej nie													2 = często tak postępuję	0 = prawie nigdy tak nie postępuję	0 = prawie nigdy tak nie postępuję	1 = rzadko tak postępuję	3 = prawie zawsze tak postępuję	2 = często tak postępuję	0 = prawie nigdy tak nie postępuję	0 = prawie nigdy tak nie postępuję	1 = rzadko tak postępuję	0 = prawie nigdy tak nie postępuję	1 = rzadko tak postępuję	2 = często tak postępuję	2 = często tak postępuję	1 = rzadko tak postępuję	0 = prawie nigdy tak nie postępuję	1 = rzadko tak postępuję	0 = prawie nigdy tak nie postępuję
2020-12-13 14:58:22	61	41		single shift	No			in relation with	secondary/post-secondary	primary care nurse	5	5			Yes, I take medical duty on a part-time basis	Yes			3 = prawie zawsze tak postępuję	1 – no													2 = często tak postępuję	0 = prawie nigdy tak nie postępuję	0 = prawie nigdy tak nie postępuję	2 = często tak postępuję	1 = rzadko tak postępuję	2 = często tak postępuję	0 = prawie nigdy tak nie postępuję	0 = prawie nigdy tak nie postępuję	2 = często tak postępuję	0 = prawie nigdy tak nie postępuję	2 = często tak postępuję	0 = prawie nigdy tak nie postępuję	2 = często tak postępuję	2 = często tak postępuję	0 = prawie nigdy tak nie postępuję	0 = prawie nigdy tak nie postępuję	0 = prawie nigdy tak nie postępuję
2020-12-13 15:09:26	49	29		single shift	No			in relation with	higher master's degree	primary care nurse	4	4			Yes	Yes			1 = rzadko tak postępuję	3 – raczej tak													2 = często tak postępuję	1 = rzadko tak postępuję	1 = rzadko tak postępuję	1 = rzadko tak postępuję	1 = rzadko tak postępuję	2 = często tak postępuję	0 = prawie nigdy tak nie postępuję	2 = często tak postępuję	1 = rzadko tak postępuję	1 = rzadko tak postępuję	2 = często tak postępuję	1 = rzadko tak postępuję	2 = często tak postępuję	2 = często tak postępuję	1 = rzadko tak postępuję	0 = prawie nigdy tak nie postępuję	0 = prawie nigdy tak nie postępuję
2020-12-13 15:27:07	32	10		single shift	sometimes			in relation with	bachelor's degree	primary care nurse	4	2			Yes	Yes			2 = często tak postępuję	3 – raczej tak													1 = rzadko tak postępuję	0 = prawie nigdy tak nie postępuję	0 = prawie nigdy tak nie postępuję	0 = prawie nigdy tak nie postępuję	1 = rzadko tak postępuję	3 = prawie zawsze tak postępuję	1 = rzadko tak postępuję	3 = prawie zawsze tak postępuję	2 = często tak postępuję	0 = prawie nigdy tak nie postępuję	1 = rzadko tak postępuję	3 = prawie zawsze tak postępuję	2 = często tak postępuję	1 = rzadko tak postępuję	1 = rzadko tak postępuję	0 = prawie nigdy tak nie postępuję	1 = rzadko tak postępuję
2020-12-13 15:34:22	46	25 years		single shift	Yes, quite often			in a relationship, without the children	higher master's degree	primary care nurse	3	1			No, I still work in a different workplace	No			2 = często tak postępuję	2 – raczej nie													3 = prawie zawsze tak postępuję	2 = często tak postępuję	0 = prawie nigdy tak nie postępuję	1 = rzadko tak postępuję	3 = prawie zawsze tak postępuję	3 = prawie zawsze tak postępuję	3 = prawie zawsze tak postępuję	2 = często tak postępuję	2 = często tak postępuję	0 = prawie nigdy tak nie postępuję	1 = rzadko tak postępuję	1 = rzadko tak postępuję	1 = rzadko tak postępuję	2 = często tak postępuję	1 = rzadko tak postępuję	3 = prawie zawsze tak postępuję	1 = rzadko tak postępuję
2020-12-13 15:38:01	40	6 years		single shift	sometimes			in connection with children	higher master's degree	primary care nurse	4	3			Occupational medicine a few times a month	Yes			1 = rzadko tak postępuję	3 – raczej tak													2 = często tak postępuję	0 = prawie nigdy tak nie postępuję	0 = prawie nigdy tak nie postępuję	1 = rzadko tak postępuję	1 = rzadko tak postępuję	2 = często tak postępuję	0 = prawie nigdy tak nie postępuję	1 = rzadko tak postępuję	2 = często tak postępuję	0 = prawie nigdy tak nie postępuję	1 = rzadko tak postępuję	1 = rzadko tak postępuję	2 = często tak postępuję	1 = rzadko tak postępuję	0 = prawie nigdy tak nie postępuję	2 = często tak postępuję	0 = prawie nigdy tak nie postępuję
2020-12-13 15:51:53	59	40		single shift	No			in relation with	secondary/post-secondary	primary care nurse	4	4			I work on a contract	Yes			3 = prawie zawsze tak postępuję	3 – raczej tak													2 = często tak postępuję	0 = prawie nigdy tak nie postępuję	0 = prawie nigdy tak nie postępuję	2 = często tak postępuję	1 = rzadko tak postępuję	3 = prawie zawsze tak postępuję	1 = rzadko tak postępuję	1 = rzadko tak postępuję	0 = prawie nigdy tak nie postępuję	0 = prawie nigdy tak nie postępuję	2 = często tak postępuję	1 = rzadko tak postępuję	3 = prawie zawsze tak postępuję	1 = rzadko tak postępuję	0 = prawie nigdy tak nie postępuję	2 = często tak postępuję	1 = rzadko tak postępuję
2020-12-13 16:16:18	60	40		single shift	No			in relation with	secondary/post-secondary	primary care nurse	3	1			Yes	Occasionally			1 = rzadko tak postępuję	3 – raczej tak													2 = często tak postępuję	1 = rzadko tak postępuję	0 = prawie nigdy tak nie postępuję	1 = rzadko tak postępuję	1 = rzadko tak postępuję	2 = często tak postępuję	0 = prawie nigdy tak nie postępuję	1 = rzadko tak postępuję	1 = rzadko tak postępuję	0 = prawie nigdy tak nie postępuję	0 = prawie nigdy tak nie postępuję	0 = prawie nigdy tak nie postępuję	2 = często tak postępuję	1 = rzadko tak postępuję	0 = prawie nigdy tak nie postępuję	2 = często tak postępuję	1 = rzadko tak postępuję
2020-12-13 17:06:54	44	21		single shift	sometimes			in connection with children	bachelor's degree	primary care nurse	5	5			Yes	Yes			2 = często tak postępuję	4 – tak													2 = często tak postępuję	0 = prawie nigdy tak nie postępuję	1 = rzadko tak postępuję	3 = prawie zawsze tak postępuję	1 = rzadko tak postępuję	3 = prawie zawsze tak postępuję	1 = rzadko tak postępuję	1 = rzadko tak postępuję	3 = prawie zawsze tak postępuję	0 = prawie nigdy tak nie postępuję	3 = prawie zawsze tak postępuję	1 = rzadko tak postępuję	3 = prawie zawsze tak postępuję	3 = prawie zawsze tak postępuję	0 = prawie nigdy tak nie postępuję	2 = często tak postępuję	1 = rzadko tak postępuję
2020-12-13 17:17:53	53	33		two-shift	sometimes			in connection with children	bachelor's degree	ward nurse, coordinating nurse	4	3			Yes	Yes			2 = często tak postępuję	3 – raczej tak													1 = rzadko tak postępuję	1 = rzadko tak postępuję	0 = prawie nigdy tak nie postępuję	2 = często tak postępuję	2 = często tak postępuję	2 = często tak postępuję	1 = rzadko tak postępuję	1 = rzadko tak postępuję	2 = często tak postępuję	0 = prawie nigdy tak nie postępuję	1 = rzadko tak postępuję	2 = często tak postępuję	2 = często tak postępuję	2 = często tak postępuję	2 = często tak postępuję	2 = często tak postępuję	1 = rzadko tak postępuję
2020-12-13 17:18:48	47	25		two-shift	sometimes			in connection with children	bachelor's degree	primary care nurse	4	5			Yes	Yes			2 = często tak postępuję	3 – raczej tak													2 = często tak postępuję	1 = rzadko tak postępuję	0 = prawie nigdy tak nie postępuję	2 = często tak postępuję	1 = rzadko tak postępuję	2 = często tak postępuję	2 = często tak postępuję	0 = prawie nigdy tak nie postępuję	2 = często tak postępuję	0 = prawie nigdy tak nie postępuję	1 = rzadko tak postępuję	1 = rzadko tak postępuję	1 = rzadko tak postępuję	2 = często tak postępuję	1 = rzadko tak postępuję	1 = rzadko tak postępuję	0 = prawie nigdy tak nie postępuję
2020-12-13 17:23:03	47	27		single shift	No			in connection with children	bachelor's degree	primary care nurse	4	5			No, I still work in a different workplace	No			1 = rzadko tak postępuję	3 – raczej tak													2 = często tak postępuję	1 = rzadko tak postępuję	1 = rzadko tak postępuję	2 = często tak postępuję	1 = rzadko tak postępuję	2 = często tak postępuję	1 = rzadko tak postępuję	1 = rzadko tak postępuję	2 = często tak postępuję	1 = rzadko tak postępuję	2 = często tak postępuję	1 = rzadko tak postępuję	2 = często tak postępuję	2 = często tak postępuję	1 = rzadko tak postępuję	1 = rzadko tak postępuję	1 = rzadko tak postępuję
2020-12-13 18:23:13	24	2 years		shift (12 hours)	No			Miss / Bachelor	higher master's degree	section nurse	4	2			Yes	Yes			2 = często tak postępuję	3 – raczej tak													1 = rzadko tak postępuję	0 = prawie nigdy tak nie postępuję	1 = rzadko tak postępuję	2 = często tak postępuję	1 = rzadko tak postępuję	2 = często tak postępuję	1 = rzadko tak postępuję	1 = rzadko tak postępuję	1 = rzadko tak postępuję	0 = prawie nigdy tak nie postępuję	0 = prawie nigdy tak nie postępuję	2 = często tak postępuję	1 = rzadko tak postępuję	1 = rzadko tak postępuję	1 = rzadko tak postępuję	1 = rzadko tak postępuję	0 = prawie nigdy tak nie postępuję
2020-12-13 18:34:17	54	34		single shift	No			in relation with	secondary/post-secondary	primary care nurse	3	5			Yes	Yes			1 = rzadko tak postępuję	3 – raczej tak													2 = często tak postępuję	0 = prawie nigdy tak nie postępuję	0 = prawie nigdy tak nie postępuję	1 = rzadko tak postępuję	2 = często tak postępuję	1 = rzadko tak postępuję	0 = prawie nigdy tak nie postępuję	1 = rzadko tak postępuję	1 = rzadko tak postępuję	0 = prawie nigdy tak nie postępuję	1 = rzadko tak postępuję	1 = rzadko tak postępuję	1 = rzadko tak postępuję	1 = rzadko tak postępuję	1 = rzadko tak postępuję	1 = rzadko tak postępuję	1 = rzadko tak postępuję
2020-12-13 19:02:25	48	28		single shift	sometimes			in connection with children	secondary/post-secondary	primary care nurse	4	4			Yes	Yes			2 = często tak postępuję	3 – raczej tak													2 = często tak postępuję	0 = prawie nigdy tak nie postępuję	1 = rzadko tak postępuję	2 = często tak postępuję	1 = rzadko tak postępuję	2 = często tak postępuję	2 = często tak postępuję	1 = rzadko tak postępuję	2 = często tak postępuję	1 = rzadko tak postępuję	2 = często tak postępuję	2 = często tak postępuję	2 = często tak postępuję	2 = często tak postępuję	2 = często tak postępuję	2 = często tak postępuję	1 = rzadko tak postępuję
2020-12-13 19:04:51	44	23		single shift	sometimes			in connection with children	bachelor's degree	primary care nurse	4	4			No, I still work in a different workplace	Yes			2 = często tak postępuję	3 – raczej tak													2 = często tak postępuję	1 = rzadko tak postępuję	1 = rzadko tak postępuję	2 = często tak postępuję	1 = rzadko tak postępuję	2 = często tak postępuję	1 = rzadko tak postępuję	1 = rzadko tak postępuję	2 = często tak postępuję	1 = rzadko tak postępuję	2 = często tak postępuję	1 = rzadko tak postępuję	2 = często tak postępuję	2 = często tak postępuję	1 = rzadko tak postępuję	2 = często tak postępuję	1 = rzadko tak postępuję
2020-12-13 20:24:52	47	26		single shift	Yes, quite often			in connection with children	bachelor's degree	primary care nurse	3	3			Yes	Occasionally			2 = często tak postępuję	3 – raczej tak													2 = często tak postępuję	1 = rzadko tak postępuję	0 = prawie nigdy tak nie postępuję	2 = często tak postępuję	2 = często tak postępuję	2 = często tak postępuję	1 = rzadko tak postępuję	1 = rzadko tak postępuję	2 = często tak postępuję	0 = prawie nigdy tak nie postępuję	2 = często tak postępuję	2 = często tak postępuję	2 = często tak postępuję	2 = często tak postępuję	0 = prawie nigdy tak nie postępuję	2 = często tak postępuję	1 = rzadko tak postępuję
2020-12-13 20:39:29	57	37		single shift	No			in relation with	Doktor	managing nurse	4	5			Yes	Yes			1 = rzadko tak postępuję	3 – raczej tak													2 = często tak postępuję	1 = rzadko tak postępuję	0 = prawie nigdy tak nie postępuję	2 = często tak postępuję	1 = rzadko tak postępuję	2 = często tak postępuję	1 = rzadko tak postępuję	1 = rzadko tak postępuję	2 = często tak postępuję	0 = prawie nigdy tak nie postępuję	2 = często tak postępuję	1 = rzadko tak postępuję	2 = często tak postępuję	1 = rzadko tak postępuję	1 = rzadko tak postępuję	2 = często tak postępuję	1 = rzadko tak postępuję
2020-12-13 21:52:29	48	25		single shift	No			in relation with	secondary/post-secondary	primary care nurse	3	1			Yes	No			3 = prawie zawsze tak postępuję	2 – raczej nie													2 = często tak postępuję	0 = prawie nigdy tak nie postępuję	0 = prawie nigdy tak nie postępuję	0 = prawie nigdy tak nie postępuję	2 = często tak postępuję	1 = rzadko tak postępuję	2 = często tak postępuję	1 = rzadko tak postępuję	0 = prawie nigdy tak nie postępuję	0 = prawie nigdy tak nie postępuję	0 = prawie nigdy tak nie postępuję	1 = rzadko tak postępuję	2 = często tak postępuję	0 = prawie nigdy tak nie postępuję	2 = często tak postępuję	0 = prawie nigdy tak nie postępuję	0 = prawie nigdy tak nie postępuję
2020-12-13 23:43:04	51	30		shift (7,35 h)	sometimes			in relation with	secondary/post-secondary	primary care nurse	4	4			Yes, I take medical duty on a part-time basis	Yes			2 = często tak postępuję	3 – raczej tak													3 = prawie zawsze tak postępuję	0 = prawie nigdy tak nie postępuję	1 = rzadko tak postępuję	1 = rzadko tak postępuję	2 = często tak postępuję	2 = często tak postępuję	2 = często tak postępuję	2 = często tak postępuję	1 = rzadko tak postępuję	0 = prawie nigdy tak nie postępuję	1 = rzadko tak postępuję	2 = często tak postępuję	2 = często tak postępuję	1 = rzadko tak postępuję	1 = rzadko tak postępuję	2 = często tak postępuję	0 = prawie nigdy tak nie postępuję
2020-12-14 05:58:38	61	41		single shift	sometimes			in relation with	higher master's degree	independent specialist	4	4			Yes	Yes			1 = rzadko tak postępuję	4 – tak													2 = często tak postępuję	0 = prawie nigdy tak nie postępuję	0 = prawie nigdy tak nie postępuję	2 = często tak postępuję	0 = prawie nigdy tak nie postępuję	3 = prawie zawsze tak postępuję	0 = prawie nigdy tak nie postępuję	2 = często tak postępuję	2 = często tak postępuję	0 = prawie nigdy tak nie postępuję	3 = prawie zawsze tak postępuję	2 = często tak postępuję	3 = prawie zawsze tak postępuję	2 = często tak postępuję	0 = prawie nigdy tak nie postępuję	3 = prawie zawsze tak postępuję	0 = prawie nigdy tak nie postępuję
2020-12-14 06:32:19	49	29 years		single shift	Yes, quite often			in connection with children	higher master's degree	independent specialist	3	4			Yes	Yes			2 = często tak postępuję	3 – raczej tak													1 = rzadko tak postępuję	0 = prawie nigdy tak nie postępuję	1 = rzadko tak postępuję	1 = rzadko tak postępuję	1 = rzadko tak postępuję	2 = często tak postępuję	1 = rzadko tak postępuję	2 = często tak postępuję	1 = rzadko tak postępuję	1 = rzadko tak postępuję	2 = często tak postępuję	1 = rzadko tak postępuję	2 = często tak postępuję	1 = rzadko tak postępuję	1 = rzadko tak postępuję	2 = często tak postępuję	1 = rzadko tak postępuję
2020-12-14 07:03:24	40	18		two-shift	sometimes			in connection with children	higher master's degree	primary care nurse	5	4			No, I still work in a different workplace	Occasionally			2 = często tak postępuję	3 – raczej tak													2 = często tak postępuję	1 = rzadko tak postępuję	1 = rzadko tak postępuję	2 = często tak postępuję	1 = rzadko tak postępuję	2 = często tak postępuję	1 = rzadko tak postępuję	1 = rzadko tak postępuję	2 = często tak postępuję	1 = rzadko tak postępuję	2 = często tak postępuję	2 = często tak postępuję	2 = często tak postępuję	2 = często tak postępuję	1 = rzadko tak postępuję	2 = często tak postępuję	2 = często tak postępuję
2020-12-14 08:02:27	44	18 years		single shift	No			in relation with	secondary/post-secondary	primary care nurse	4	2			No, I still work in a different workplace	Yes			1 = rzadko tak postępuję	3 – raczej tak													3 = prawie zawsze tak postępuję	1 = rzadko tak postępuję	0 = prawie nigdy tak nie postępuję	0 = prawie nigdy tak nie postępuję	0 = prawie nigdy tak nie postępuję	2 = często tak postępuję	1 = rzadko tak postępuję	2 = często tak postępuję	1 = rzadko tak postępuję	0 = prawie nigdy tak nie postępuję	2 = często tak postępuję	1 = rzadko tak postępuję	2 = często tak postępuję	0 = prawie nigdy tak nie postępuję	0 = prawie nigdy tak nie postępuję	2 = często tak postępuję	2 = często tak postępuję
2020-12-14 08:58:58	58	37		shift (12 hours)	sometimes			in relation with	secondary/post-secondary	section nurse	4	5			Yes	Yes			2 = często tak postępuję	3 – raczej tak													2 = często tak postępuję	2 = często tak postępuję	0 = prawie nigdy tak nie postępuję	2 = często tak postępuję	1 = rzadko tak postępuję	2 = często tak postępuję	2 = często tak postępuję	2 = często tak postępuję	0 = prawie nigdy tak nie postępuję	0 = prawie nigdy tak nie postępuję	2 = często tak postępuję	1 = rzadko tak postępuję	2 = często tak postępuję	2 = często tak postępuję	0 = prawie nigdy tak nie postępuję	2 = często tak postępuję	2 = często tak postępuję
2020-12-14 09:18:49	49	24 years		shift (12 hours)	sometimes			in connection with children	secondary/post-secondary	section nurse	3	5			Yes	Yes			2 = często tak postępuję	3 – raczej tak													3 = prawie zawsze tak postępuję	2 = często tak postępuję	0 = prawie nigdy tak nie postępuję	2 = często tak postępuję	1 = rzadko tak postępuję	2 = często tak postępuję	2 = często tak postępuję	2 = często tak postępuję	2 = często tak postępuję	0 = prawie nigdy tak nie postępuję	2 = często tak postępuję	1 = rzadko tak postępuję	2 = często tak postępuję	2 = często tak postępuję	0 = prawie nigdy tak nie postępuję	2 = często tak postępuję	2 = często tak postępuję
2020-12-14 09:36:44	49	30		single shift	No			in relation with	higher master's degree	primary care nurse	3	4			Yes	Yes			1 = rzadko tak postępuję	3 – raczej tak													2 = często tak postępuję	1 = rzadko tak postępuję	0 = prawie nigdy tak nie postępuję	1 = rzadko tak postępuję	2 = często tak postępuję	2 = często tak postępuję	0 = prawie nigdy tak nie postępuję	2 = często tak postępuję	1 = rzadko tak postępuję	0 = prawie nigdy tak nie postępuję	2 = często tak postępuję	2 = często tak postępuję	2 = często tak postępuję	2 = często tak postępuję	1 = rzadko tak postępuję	1 = rzadko tak postępuję	1 = rzadko tak postępuję
2020-12-14 14:36:39	60	35		single shift	No			in connection with children	Ph.D., D.Sc (Med.)	lecturer	5	2			Yes	Yes			3 = prawie zawsze tak postępuję	4 – tak													3 = prawie zawsze tak postępuję	1 = rzadko tak postępuję	2 = często tak postępuję	2 = często tak postępuję	1 = rzadko tak postępuję	3 = prawie zawsze tak postępuję	1 = rzadko tak postępuję	0 = prawie nigdy tak nie postępuję	2 = często tak postępuję	2 = często tak postępuję	2 = często tak postępuję	3 = prawie zawsze tak postępuję	3 = prawie zawsze tak postępuję	3 = prawie zawsze tak postępuję	0 = prawie nigdy tak nie postępuję	2 = często tak postępuję	1 = rzadko tak postępuję
2020-12-14 15:27:31	52	30 years		single shift	sometimes			in connection with children	higher master's degree	ward nurse, coordinating nurse	4	5			Yes	Yes			3 = prawie zawsze tak postępuję	3 – raczej tak													2 = często tak postępuję	0 = prawie nigdy tak nie postępuję	0 = prawie nigdy tak nie postępuję	2 = często tak postępuję	1 = rzadko tak postępuję	3 = prawie zawsze tak postępuję	0 = prawie nigdy tak nie postępuję	3 = prawie zawsze tak postępuję	2 = często tak postępuję	0 = prawie nigdy tak nie postępuję	2 = często tak postępuję	0 = prawie nigdy tak nie postępuję	3 = prawie zawsze tak postępuję	2 = często tak postępuję	1 = rzadko tak postępuję	2 = często tak postępuję	2 = często tak postępuję
2020-12-14 16:02:28	61	42		single shift	No			in relation with	higher master's degree	ward nurse, coordinating nurse	4	4			Yes	Yes			1 = rzadko tak postępuję	3 – raczej tak													3 = prawie zawsze tak postępuję	1 = rzadko tak postępuję	0 = prawie nigdy tak nie postępuję	1 = rzadko tak postępuję	1 = rzadko tak postępuję	2 = często tak postępuję	1 = rzadko tak postępuję	1 = rzadko tak postępuję	0 = prawie nigdy tak nie postępuję	0 = prawie nigdy tak nie postępuję	2 = często tak postępuję	2 = często tak postępuję	2 = często tak postępuję	2 = często tak postępuję	0 = prawie nigdy tak nie postępuję	2 = często tak postępuję	0 = prawie nigdy tak nie postępuję
2020-12-14 18:51:18	52	31		single shift	Yes, quite often			in relation with	higher master's degree	independent specialist	4	5			Yes	Yes			2 = często tak postępuję	4 – tak													3 = prawie zawsze tak postępuję	0 = prawie nigdy tak nie postępuję	1 = rzadko tak postępuję	0 = prawie nigdy tak nie postępuję	0 = prawie nigdy tak nie postępuję	3 = prawie zawsze tak postępuję	0 = prawie nigdy tak nie postępuję	0 = prawie nigdy tak nie postępuję	3 = prawie zawsze tak postępuję	0 = prawie nigdy tak nie postępuję	1 = rzadko tak postępuję	1 = rzadko tak postępuję	2 = często tak postępuję	1 = rzadko tak postępuję	0 = prawie nigdy tak nie postępuję	1 = rzadko tak postępuję	1 = rzadko tak postępuję
2020-12-14 20:25:13	50	28		single shift	No			in relation with	higher master's degree	ward nurse, coordinating nurse	5	5			Yes	Yes			2 = często tak postępuję	3 – raczej tak													2 = często tak postępuję	1 = rzadko tak postępuję	1 = rzadko tak postępuję	1 = rzadko tak postępuję	0 = prawie nigdy tak nie postępuję	3 = prawie zawsze tak postępuję	0 = prawie nigdy tak nie postępuję	2 = często tak postępuję	3 = prawie zawsze tak postępuję	1 = rzadko tak postępuję	2 = często tak postępuję	2 = często tak postępuję	3 = prawie zawsze tak postępuję	1 = rzadko tak postępuję	0 = prawie nigdy tak nie postępuję	2 = często tak postępuję	2 = często tak postępuję
2020-12-14 22:01:17	30	6 years		single shift	sometimes			in relation with	higher master's degree	section nurse	4	4			Yes	Yes			1 = rzadko tak postępuję	3 – raczej tak													2 = często tak postępuję	0 = prawie nigdy tak nie postępuję	0 = prawie nigdy tak nie postępuję	2 = często tak postępuję	1 = rzadko tak postępuję	2 = często tak postępuję	1 = rzadko tak postępuję	1 = rzadko tak postępuję	3 = prawie zawsze tak postępuję	0 = prawie nigdy tak nie postępuję	2 = często tak postępuję	1 = rzadko tak postępuję	3 = prawie zawsze tak postępuję	3 = prawie zawsze tak postępuję	0 = prawie nigdy tak nie postępuję	1 = rzadko tak postępuję	1 = rzadko tak postępuję
2020-12-14 22:15:14	56	33		shift (12 hours)	sometimes			in relation with	secondary/post-secondary	section nurse	4	3			Yes	Yes			2 = często tak postępuję	2 – raczej nie													2 = często tak postępuję	0 = prawie nigdy tak nie postępuję	1 = rzadko tak postępuję	1 = rzadko tak postępuję	2 = często tak postępuję	1 = rzadko tak postępuję	2 = często tak postępuję	1 = rzadko tak postępuję	2 = często tak postępuję	1 = rzadko tak postępuję	2 = często tak postępuję	2 = często tak postępuję	1 = rzadko tak postępuję	2 = często tak postępuję	2 = często tak postępuję	2 = często tak postępuję	2 = często tak postępuję
2020-12-14 23:34:16	57	35 years		single shift	No			single	higher master's degree	section nurse	4	5			No, I still work in a different workplace	Yes			3 = prawie zawsze tak postępuję	3 – raczej tak													3 = prawie zawsze tak postępuję	1 = rzadko tak postępuję	0 = prawie nigdy tak nie postępuję	3 = prawie zawsze tak postępuję	1 = rzadko tak postępuję	3 = prawie zawsze tak postępuję	0 = prawie nigdy tak nie postępuję	2 = często tak postępuję	3 = prawie zawsze tak postępuję	0 = prawie nigdy tak nie postępuję	2 = często tak postępuję	2 = często tak postępuję	2 = często tak postępuję	3 = prawie zawsze tak postępuję	0 = prawie nigdy tak nie postępuję	2 = często tak postępuję	2 = często tak postępuję
2020-12-15 05:12:27	59	39		single shift	Yes, quite often			in relation with	higher master's degree	ward nurse, coordinating nurse	4	5			Yes	Yes			3 = prawie zawsze tak postępuję	4 – tak													3 = prawie zawsze tak postępuję	3 = prawie zawsze tak postępuję	0 = prawie nigdy tak nie postępuję	1 = rzadko tak postępuję	0 = prawie nigdy tak nie postępuję	3 = prawie zawsze tak postępuję	3 = prawie zawsze tak postępuję	3 = prawie zawsze tak postępuję	2 = często tak postępuję	0 = prawie nigdy tak nie postępuję	3 = prawie zawsze tak postępuję	2 = często tak postępuję	3 = prawie zawsze tak postępuję	3 = prawie zawsze tak postępuję	0 = prawie nigdy tak nie postępuję	3 = prawie zawsze tak postępuję	1 = rzadko tak postępuję
2020-12-15 08:18:26	59	36 years		single shift	Yes, quite often			in relation with	secondary/post-secondary	ward nurse, coordinating nurse	4	5			No, I still work in a different workplace	Yes			2 = często tak postępuję	4 – tak													3 = prawie zawsze tak postępuję	0 = prawie nigdy tak nie postępuję	0 = prawie nigdy tak nie postępuję	2 = często tak postępuję	0 = prawie nigdy tak nie postępuję	3 = prawie zawsze tak postępuję	0 = prawie nigdy tak nie postępuję	1 = rzadko tak postępuję	2 = często tak postępuję	0 = prawie nigdy tak nie postępuję	2 = często tak postępuję	1 = rzadko tak postępuję	3 = prawie zawsze tak postępuję	2 = często tak postępuję	0 = prawie nigdy tak nie postępuję	3 = prawie zawsze tak postępuję	0 = prawie nigdy tak nie postępuję
2020-12-15 08:32:14	47	23		24 hours	Yes, quite often			in relation with	bachelor's degree	section nurse	2	3			No, I still work in a different workplace	Yes			3 = prawie zawsze tak postępuję	2 – raczej nie													2 = często tak postępuję	0 = prawie nigdy tak nie postępuję	0 = prawie nigdy tak nie postępuję	2 = często tak postępuję	2 = często tak postępuję	2 = często tak postępuję	0 = prawie nigdy tak nie postępuję	3 = prawie zawsze tak postępuję	2 = często tak postępuję	0 = prawie nigdy tak nie postępuję	2 = często tak postępuję	1 = rzadko tak postępuję	0 = prawie nigdy tak nie postępuję	2 = często tak postępuję	2 = często tak postępuję	1 = rzadko tak postępuję	2 = często tak postępuję
2020-12-15 08:41:24	30	6 months		24-hours	sometimes			in relation with	bachelor's degree	section nurse	5	5			Yes	Yes			2 = często tak postępuję	3 – raczej tak													3 = prawie zawsze tak postępuję	0 = prawie nigdy tak nie postępuję	0 = prawie nigdy tak nie postępuję	3 = prawie zawsze tak postępuję	0 = prawie nigdy tak nie postępuję	3 = prawie zawsze tak postępuję	0 = prawie nigdy tak nie postępuję	1 = rzadko tak postępuję	2 = często tak postępuję	0 = prawie nigdy tak nie postępuję	2 = często tak postępuję	1 = rzadko tak postępuję	2 = często tak postępuję	3 = prawie zawsze tak postępuję	0 = prawie nigdy tak nie postępuję	1 = rzadko tak postępuję	1 = rzadko tak postępuję
2020-12-15 08:46:47	28	3 years		shift (12 hours)	No			in a relationship, without the children	higher master's degree	section nurse	5	5			Yes	Yes			2 = często tak postępuję	3 – raczej tak													2 = często tak postępuję	1 = rzadko tak postępuję	0 = prawie nigdy tak nie postępuję	2 = często tak postępuję	1 = rzadko tak postępuję	2 = często tak postępuję	2 = często tak postępuję	2 = często tak postępuję	3 = prawie zawsze tak postępuję	0 = prawie nigdy tak nie postępuję	2 = często tak postępuję	2 = często tak postępuję	2 = często tak postępuję	3 = prawie zawsze tak postępuję	1 = rzadko tak postępuję	2 = często tak postępuję	2 = często tak postępuję
2020-12-15 09:00:43	22	3 months		shift (12 hours)	sometimes			Miss / Bachelor	bachelor's degree	section nurse	3	3			Yes	Yes			3 = prawie zawsze tak postępuję	2 – raczej nie													1 = rzadko tak postępuję	0 = prawie nigdy tak nie postępuję	1 = rzadko tak postępuję	0 = prawie nigdy tak nie postępuję	2 = często tak postępuję	1 = rzadko tak postępuję	1 = rzadko tak postępuję	2 = często tak postępuję	2 = często tak postępuję	1 = rzadko tak postępuję	1 = rzadko tak postępuję	3 = prawie zawsze tak postępuję	1 = rzadko tak postępuję	1 = rzadko tak postępuję	2 = często tak postępuję	1 = rzadko tak postępuję	2 = często tak postępuję
2020-12-15 09:32:31	59	39		single shift	sometimes			in relation with	bachelor's degree	ward nurse, coordinating nurse	3	5			Yes	Yes			2 = często tak postępuję	3 – raczej tak													2 = często tak postępuję	0 = prawie nigdy tak nie postępuję	0 = prawie nigdy tak nie postępuję	1 = rzadko tak postępuję	1 = rzadko tak postępuję	3 = prawie zawsze tak postępuję	1 = rzadko tak postępuję	0 = prawie nigdy tak nie postępuję	1 = rzadko tak postępuję	0 = prawie nigdy tak nie postępuję	2 = często tak postępuję	1 = rzadko tak postępuję	3 = prawie zawsze tak postępuję	1 = rzadko tak postępuję	0 = prawie nigdy tak nie postępuję	2 = często tak postępuję	0 = prawie nigdy tak nie postępuję
2020-12-15 09:32:41	48	12		single shift	No			with kids	higher master's degree	ward nurse, coordinating nurse	5	5			No, I still work in a different workplace	Yes			2 = często tak postępuję	3 – raczej tak													2 = często tak postępuję	1 = rzadko tak postępuję	0 = prawie nigdy tak nie postępuję	2 = często tak postępuję	0 = prawie nigdy tak nie postępuję	2 = często tak postępuję	1 = rzadko tak postępuję	1 = rzadko tak postępuję	1 = rzadko tak postępuję	0 = prawie nigdy tak nie postępuję	2 = często tak postępuję	0 = prawie nigdy tak nie postępuję	2 = często tak postępuję	2 = często tak postępuję	0 = prawie nigdy tak nie postępuję	2 = często tak postępuję	1 = rzadko tak postępuję
2020-12-15 10:28:31		35 years		single shift	No			in relation with	bachelor's degree	ward nurse, coordinating nurse	5	5			Yes	Yes			1 = rzadko tak postępuję	3 – raczej tak													2 = często tak postępuję	1 = rzadko tak postępuję	0 = prawie nigdy tak nie postępuję	3 = prawie zawsze tak postępuję	1 = rzadko tak postępuję	2 = często tak postępuję	1 = rzadko tak postępuję	1 = rzadko tak postępuję	1 = rzadko tak postępuję	0 = prawie nigdy tak nie postępuję	2 = często tak postępuję	2 = często tak postępuję	2 = często tak postępuję	2 = często tak postępuję	0 = prawie nigdy tak nie postępuję	2 = często tak postępuję	1 = rzadko tak postępuję
2020-12-15 10:53:35	49	27		single shift	sometimes			in relation with	higher master's degree	ward nurse, coordinating nurse	2	2			No, I still work in a different workplace	Yes			1 = rzadko tak postępuję	2 – raczej nie													2 = często tak postępuję	1 = rzadko tak postępuję	0 = prawie nigdy tak nie postępuję	1 = rzadko tak postępuję	2 = często tak postępuję	1 = rzadko tak postępuję	1 = rzadko tak postępuję	1 = rzadko tak postępuję	2 = często tak postępuję	0 = prawie nigdy tak nie postępuję	0 = prawie nigdy tak nie postępuję	2 = często tak postępuję	1 = rzadko tak postępuję	1 = rzadko tak postępuję	2 = często tak postępuję	1 = rzadko tak postępuję	1 = rzadko tak postępuję
2020-12-15 10:53:48	56	35		single shift	Yes, quite often			in relation with	higher master's degree	ward nurse, coordinating nurse	4	4			Yes	Yes			2 = często tak postępuję	3 – raczej tak													2 = często tak postępuję	2 = często tak postępuję	0 = prawie nigdy tak nie postępuję	2 = często tak postępuję	1 = rzadko tak postępuję	2 = często tak postępuję	2 = często tak postępuję	2 = często tak postępuję	2 = często tak postępuję	0 = prawie nigdy tak nie postępuję	2 = często tak postępuję	1 = rzadko tak postępuję	2 = często tak postępuję	2 = często tak postępuję	1 = rzadko tak postępuję	2 = często tak postępuję	1 = rzadko tak postępuję
2020-12-15 11:33:15	24	3 months		shift (12 hours)	No			in relation with	bachelor's degree	section nurse	5	3			Yes	Occasionally			2 = często tak postępuję	3 – raczej tak													3 = prawie zawsze tak postępuję	0 = prawie nigdy tak nie postępuję	0 = prawie nigdy tak nie postępuję	1 = rzadko tak postępuję	0 = prawie nigdy tak nie postępuję	3 = prawie zawsze tak postępuję	1 = rzadko tak postępuję	3 = prawie zawsze tak postępuję	2 = często tak postępuję	0 = prawie nigdy tak nie postępuję	2 = często tak postępuję	0 = prawie nigdy tak nie postępuję	3 = prawie zawsze tak postępuję	2 = często tak postępuję	0 = prawie nigdy tak nie postępuję	3 = prawie zawsze tak postępuję	3 = prawie zawsze tak postępuję
2020-12-15 13:54:04	46	26 years		shift (12 hours)	sometimes			single, with children	higher master's degree	section nurse	4	1			No, I still work in a different workplace	Nie			3 = prawie zawsze tak postępuję	4 – tak													2 = często tak postępuję	0 = prawie nigdy tak nie postępuję	0 = prawie nigdy tak nie postępuję	1 = rzadko tak postępuję	0 = prawie nigdy tak nie postępuję	2 = często tak postępuję	1 = rzadko tak postępuję	2 = często tak postępuję	1 = rzadko tak postępuję	0 = prawie nigdy tak nie postępuję	2 = często tak postępuję	1 = rzadko tak postępuję	3 = prawie zawsze tak postępuję	1 = rzadko tak postępuję	0 = prawie nigdy tak nie postępuję	2 = często tak postępuję	2 = często tak postępuję
2020-12-15 13:54:52	48	27 years		shift (12 hours)	No			in relation with	higher master's degree	section nurse	4	4			Yes	Yes			2 = często tak postępuję	3 – raczej tak													2 = często tak postępuję	2 = często tak postępuję	0 = prawie nigdy tak nie postępuję	1 = rzadko tak postępuję	1 = rzadko tak postępuję	2 = często tak postępuję	1 = rzadko tak postępuję	2 = często tak postępuję	2 = często tak postępuję	0 = prawie nigdy tak nie postępuję	1 = rzadko tak postępuję	2 = często tak postępuję	2 = często tak postępuję	1 = rzadko tak postępuję	1 = rzadko tak postępuję	2 = często tak postępuję	1 = rzadko tak postępuję
2020-12-15 14:01:09	54	35years		single shift	No			in relation with	higher master's degree	section nurse	3	4			Yes	Yes			1 = rzadko tak postępuję	3 – raczej tak													3 = prawie zawsze tak postępuję	0 = prawie nigdy tak nie postępuję	0 = prawie nigdy tak nie postępuję	2 = często tak postępuję	1 = rzadko tak postępuję	2 = często tak postępuję	0 = prawie nigdy tak nie postępuję	1 = rzadko tak postępuję	1 = rzadko tak postępuję	0 = prawie nigdy tak nie postępuję	0 = prawie nigdy tak nie postępuję	0 = prawie nigdy tak nie postępuję	3 = prawie zawsze tak postępuję	2 = często tak postępuję	0 = prawie nigdy tak nie postępuję	1 = rzadko tak postępuję	1 = rzadko tak postępuję
2020-12-15 14:07:34	56	36 years		single shift	No			in relation with	bachelor's degree	section nurse	4	5			No, I still work in a different workplace	Yes			2 = często tak postępuję	3 – raczej tak													3 = prawie zawsze tak postępuję	1 = rzadko tak postępuję	0 = prawie nigdy tak nie postępuję	2 = często tak postępuję	1 = rzadko tak postępuję	3 = prawie zawsze tak postępuję	1 = rzadko tak postępuję	1 = rzadko tak postępuję	2 = często tak postępuję	0 = prawie nigdy tak nie postępuję	2 = często tak postępuję	1 = rzadko tak postępuję	2 = często tak postępuję	2 = często tak postępuję	3 = prawie zawsze tak postępuję	3 = prawie zawsze tak postępuję	2 = często tak postępuję
2020-12-15 14:08:35	44	23		shift (12 hours)	No			in relation with	higher master's degree	section nurse	3	4			No, I still work in a different workplace	Yes			2 = często tak postępuję	3 – raczej tak													3 = prawie zawsze tak postępuję	1 = rzadko tak postępuję	1 = rzadko tak postępuję	1 = rzadko tak postępuję	1 = rzadko tak postępuję	3 = prawie zawsze tak postępuję	1 = rzadko tak postępuję	1 = rzadko tak postępuję	2 = często tak postępuję	1 = rzadko tak postępuję	2 = często tak postępuję	1 = rzadko tak postępuję	2 = często tak postępuję	1 = rzadko tak postępuję	0 = prawie nigdy tak nie postępuję	3 = prawie zawsze tak postępuję	2 = często tak postępuję
2020-12-15 14:13:00	50	30 years		shift (12 hours)	sometimes			in relation with	bachelor's degree	section nurse	3	3			Yes	Occasionally			2 = często tak postępuję	2 – raczej nie													2 = często tak postępuję	2 = często tak postępuję	2 = często tak postępuję	1 = rzadko tak postępuję	2 = często tak postępuję	2 = często tak postępuję	2 = często tak postępuję	2 = często tak postępuję	1 = rzadko tak postępuję	1 = rzadko tak postępuję	1 = rzadko tak postępuję	2 = często tak postępuję	1 = rzadko tak postępuję	1 = rzadko tak postępuję	2 = często tak postępuję	1 = rzadko tak postępuję	1 = rzadko tak postępuję
2020-12-15 14:13:01	44	24		shift (12 hours)	No			in a relationship, without the children	wyższe magisterskie	section nurse	3	1			Yes	Yes			1 = rzadko tak postępuję	3 – raczej tak													1 = rzadko tak postępuję	0 = prawie nigdy tak nie postępuję	0 = prawie nigdy tak nie postępuję	2 = często tak postępuję	3 = prawie zawsze tak postępuję	1 = rzadko tak postępuję	2 = często tak postępuję	3 = prawie zawsze tak postępuję	1 = rzadko tak postępuję	0 = prawie nigdy tak nie postępuję	0 = prawie nigdy tak nie postępuję	2 = często tak postępuję	0 = prawie nigdy tak nie postępuję	1 = rzadko tak postępuję	2 = często tak postępuję	1 = rzadko tak postępuję	1 = rzadko tak postępuję
2020-12-15 14:31:15	23	1.5 years		shift (12 hours)	No			in relation with	bachelor's degree	section nurse	4	2			Yes	Occasionally			2 = często tak postępuję	3 – raczej tak													2 = często tak postępuję	1 = rzadko tak postępuję	0 = prawie nigdy tak nie postępuję	1 = rzadko tak postępuję	1 = rzadko tak postępuję	2 = często tak postępuję	1 = rzadko tak postępuję	2 = często tak postępuję	3 = prawie zawsze tak postępuję	0 = prawie nigdy tak nie postępuję	1 = rzadko tak postępuję	2 = często tak postępuję	2 = często tak postępuję	1 = rzadko tak postępuję	1 = rzadko tak postępuję	1 = rzadko tak postępuję	2 = często tak postępuję
2020-12-15 15:27:39	64	40 lyears		shift (12 hours)	sometimes			in relation with	bachelor's degree	section nurse	3	4			Yes	Occasionally			2 = często tak postępuję	2 – raczej nie													2 = często tak postępuję	1 = rzadko tak postępuję	0 = prawie nigdy tak nie postępuję	1 = rzadko tak postępuję	1 = rzadko tak postępuję	2 = często tak postępuję	0 = prawie nigdy tak nie postępuję	1 = rzadko tak postępuję	2 = często tak postępuję	0 = prawie nigdy tak nie postępuję	2 = często tak postępuję	2 = często tak postępuję	2 = często tak postępuję	2 = często tak postępuję	1 = rzadko tak postępuję	1 = rzadko tak postępuję	0 = prawie nigdy tak nie postępuję
2020-12-15 17:05:51	31	8		shift (12 hours)	Yes, quite often			in a relationship, without the children	bachelor's degree	independent specialist	5	5			No, I still work in a different workplace	Yes			0 = prawie nigdy tak nie postępuję	3 – raczej tak													3 = prawie zawsze tak postępuję	0 = prawie nigdy tak nie postępuję	0 = prawie nigdy tak nie postępuję	2 = często tak postępuję	0 = prawie nigdy tak nie postępuję	3 = prawie zawsze tak postępuję	0 = prawie nigdy tak nie postępuję	0 = prawie nigdy tak nie postępuję	3 = prawie zawsze tak postępuję	0 = prawie nigdy tak nie postępuję	3 = prawie zawsze tak postępuję	0 = prawie nigdy tak nie postępuję	3 = prawie zawsze tak postępuję	2 = często tak postępuję	0 = prawie nigdy tak nie postępuję	3 = prawie zawsze tak postępuję	1 = rzadko tak postępuję
2020-12-15 19:07:42	29	7		shift (12 hours)	No			in a relationship, without the children	higher master's degree	section nurse	5	5			Yes	Occasionally			1 = rzadko tak postępuję	3 – raczej tak													2 = często tak postępuję	0 = prawie nigdy tak nie postępuję	0 = prawie nigdy tak nie postępuję	2 = często tak postępuję	0 = prawie nigdy tak nie postępuję	2 = często tak postępuję	0 = prawie nigdy tak nie postępuję	1 = rzadko tak postępuję	2 = często tak postępuję	0 = prawie nigdy tak nie postępuję	1 = rzadko tak postępuję	1 = rzadko tak postępuję	3 = prawie zawsze tak postępuję	2 = często tak postępuję	0 = prawie nigdy tak nie postępuję	2 = często tak postępuję	1 = rzadko tak postępuję
2020-12-15 19:20:01	46	26		shift (12 hours)	sometimes			in a relationship, without the children	bachelor's degree	section nurse	4	3			Yes	Yes			1 = rzadko tak postępuję	4 – tak													2 = często tak postępuję	1 = rzadko tak postępuję	2 = często tak postępuję	2 = często tak postępuję	1 = rzadko tak postępuję	3 = prawie zawsze tak postępuję	1 = rzadko tak postępuję	2 = często tak postępuję	2 = często tak postępuję	2 = często tak postępuję	2 = często tak postępuję	1 = rzadko tak postępuję	3 = prawie zawsze tak postępuję	2 = często tak postępuję	0 = prawie nigdy tak nie postępuję	2 = często tak postępuję	2 = często tak postępuję
2020-12-15 20:12:40	54	34		8-18	No			in relation with	higher master's degree	primary care nurse	5	5			I work on a contract	No			3 = prawie zawsze tak postępuję	4 – tak													3 = prawie zawsze tak postępuję	0 = prawie nigdy tak nie postępuję	0 = prawie nigdy tak nie postępuję	3 = prawie zawsze tak postępuję	0 = prawie nigdy tak nie postępuję	3 = prawie zawsze tak postępuję	0 = prawie nigdy tak nie postępuję	1 = rzadko tak postępuję	3 = prawie zawsze tak postępuję	0 = prawie nigdy tak nie postępuję	3 = prawie zawsze tak postępuję	2 = często tak postępuję	3 = prawie zawsze tak postępuję	3 = prawie zawsze tak postępuję	0 = prawie nigdy tak nie postępuję	3 = prawie zawsze tak postępuję	3 = prawie zawsze tak postępuję
2020-12-15 21:27:32	52	32		shift (12 hours)	sometimes			in a relationship, without the children	higher master's degree	ward nurse, coordinating nurse	4	4			No, I still work in a different workplace	Occasionally			2 = często tak postępuję	3 – raczej tak													1 = rzadko tak postępuję	2 = często tak postępuję	3 = prawie zawsze tak postępuję	2 = często tak postępuję	2 = często tak postępuję	2 = często tak postępuję	2 = często tak postępuję	1 = rzadko tak postępuję	2 = często tak postępuję	1 = rzadko tak postępuję	1 = rzadko tak postępuję	2 = często tak postępuję	2 = często tak postępuję	2 = często tak postępuję	1 = rzadko tak postępuję	2 = często tak postępuję	0 = prawie nigdy tak nie postępuję
2020-12-15 21:39:45	52	21		shift (12 hours)	sometimes			in a relationship, without the children	higher master's degree	section nurse	4	2			Yes	No			1 = rzadko tak postępuję	3 – raczej tak													3 = prawie zawsze tak postępuję	0 = prawie nigdy tak nie postępuję	0 = prawie nigdy tak nie postępuję	2 = często tak postępuję	1 = rzadko tak postępuję	2 = często tak postępuję	0 = prawie nigdy tak nie postępuję	0 = prawie nigdy tak nie postępuję	2 = często tak postępuję	0 = prawie nigdy tak nie postępuję	1 = rzadko tak postępuję	1 = rzadko tak postępuję	2 = często tak postępuję	2 = często tak postępuję	0 = prawie nigdy tak nie postępuję	1 = rzadko tak postępuję	0 = prawie nigdy tak nie postępuję
2020-12-16 06:36:00	25	3 years		shift (12 hours)	sometimes			Miss / Bachelor	higher master's degree	section nurse	4	4			Yes	Occasionally			2 = często tak postępuję	3 – raczej tak													2 = często tak postępuję	0 = prawie nigdy tak nie postępuję	0 = prawie nigdy tak nie postępuję	2 = często tak postępuję	1 = rzadko tak postępuję	2 = często tak postępuję	0 = prawie nigdy tak nie postępuję	2 = często tak postępuję	2 = często tak postępuję	0 = prawie nigdy tak nie postępuję	2 = często tak postępuję	2 = często tak postępuję	2 = często tak postępuję	1 = rzadko tak postępuję	1 = rzadko tak postępuję	2 = często tak postępuję	2 = często tak postępuję
2020-12-16 09:09:51	34	12 years		single shift	sometimes			in a relationship, without the children	bachelor's degree	primary care nurse	5	5			Yes	Yes			3 = prawie zawsze tak postępuję	3 – raczej tak													3 = prawie zawsze tak postępuję	1 = rzadko tak postępuję	1 = rzadko tak postępuję	2 = często tak postępuję	0 = prawie nigdy tak nie postępuję	3 = prawie zawsze tak postępuję	1 = rzadko tak postępuję	2 = często tak postępuję	2 = często tak postępuję	1 = rzadko tak postępuję	2 = często tak postępuję	2 = często tak postępuję	2 = często tak postępuję	2 = często tak postępuję	0 = prawie nigdy tak nie postępuję	2 = często tak postępuję	3 = prawie zawsze tak postępuję
2020-12-16 10:22:25	63	43		single shift	sometimes			in relation with	secondary/post-secondary	primary care nurse	4	4			No, I still work in a different workplace	Yes			3 = prawie zawsze tak postępuję	3 – raczej tak													2 = często tak postępuję	2 = często tak postępuję	0 = prawie nigdy tak nie postępuję	2 = często tak postępuję	1 = rzadko tak postępuję	3 = prawie zawsze tak postępuję	3 = prawie zawsze tak postępuję	3 = prawie zawsze tak postępuję	1 = rzadko tak postępuję	0 = prawie nigdy tak nie postępuję	1 = rzadko tak postępuję	1 = rzadko tak postępuję	2 = często tak postępuję	2 = często tak postępuję	1 = rzadko tak postępuję	2 = często tak postępuję	1 = rzadko tak postępuję
2020-12-16 10:22:42	57	37 years		single shift	sometimes			in relation with	higher master's degree	ward nurse, coordinating nurse	3	3			Yes	Yes			2 = często tak postępuję	3 – raczej tak													2 = często tak postępuję	1 = rzadko tak postępuję	0 = prawie nigdy tak nie postępuję	2 = często tak postępuję	1 = rzadko tak postępuję	2 = często tak postępuję	1 = rzadko tak postępuję	1 = rzadko tak postępuję	1 = rzadko tak postępuję	0 = prawie nigdy tak nie postępuję	2 = często tak postępuję	2 = często tak postępuję	3 = prawie zawsze tak postępuję	2 = często tak postępuję	0 = prawie nigdy tak nie postępuję	2 = często tak postępuję	1 = rzadko tak postępuję
2020-12-16 10:58:58	27	4 months		shift (12 hours)	Yes, quite often			Miss / Bachelor	bachelor's degree	section nurse	4	3			No, I still work in a different workplace	Occasionally			2 = często tak postępuję	3 – raczej tak													2 = często tak postępuję	1 = rzadko tak postępuję	1 = rzadko tak postępuję	2 = często tak postępuję	1 = rzadko tak postępuję	3 = prawie zawsze tak postępuję	0 = prawie nigdy tak nie postępuję	1 = rzadko tak postępuję	2 = często tak postępuję	0 = prawie nigdy tak nie postępuję	1 = rzadko tak postępuję	1 = rzadko tak postępuję	2 = często tak postępuję	2 = często tak postępuję	1 = rzadko tak postępuję	0 = prawie nigdy tak nie postępuję	1 = rzadko tak postępuję
2020-12-16 12:11:28	49	28		single shift	sometimes			in a relationship, without the children	higher master's degree	primary care nurse	3	5			Yes	Occasionally			2 = często tak postępuję	3 – raczej tak													2 = często tak postępuję	1 = rzadko tak postępuję	0 = prawie nigdy tak nie postępuję	2 = często tak postępuję	1 = rzadko tak postępuję	1 = rzadko tak postępuję	1 = rzadko tak postępuję	2 = często tak postępuję	1 = rzadko tak postępuję	0 = prawie nigdy tak nie postępuję	2 = często tak postępuję	1 = rzadko tak postępuję	1 = rzadko tak postępuję	2 = często tak postępuję	1 = rzadko tak postępuję	2 = często tak postępuję	2 = często tak postępuję
2020-12-16 12:33:53	44	24 years		single shift	Yes, quite often			with kids	higher master's degree	ward nurse, coordinating nurse	4	4			Yes	Yes			3 = prawie zawsze tak postępuję	2 – raczej nie													2 = często tak postępuję	1 = rzadko tak postępuję	0 = prawie nigdy tak nie postępuję	2 = często tak postępuję	1 = rzadko tak postępuję	2 = często tak postępuję	1 = rzadko tak postępuję	2 = często tak postępuję	2 = często tak postępuję	0 = prawie nigdy tak nie postępuję	2 = często tak postępuję	1 = rzadko tak postępuję	2 = często tak postępuję	2 = często tak postępuję	1 = rzadko tak postępuję	2 = często tak postępuję	1 = rzadko tak postępuję
2020-12-16 15:10:13	24	3 years		shift (12 hours)	No			Miss / Bachelor	higher master's degree	section nurse	4	5			No, I still work in a different workplace	Yes			2 = często tak postępuję	3 – raczej tak													3 = prawie zawsze tak postępuję	0 = prawie nigdy tak nie postępuję	0 = prawie nigdy tak nie postępuję	3 = prawie zawsze tak postępuję	0 = prawie nigdy tak nie postępuję	3 = prawie zawsze tak postępuję	0 = prawie nigdy tak nie postępuję	1 = rzadko tak postępuję	2 = często tak postępuję	0 = prawie nigdy tak nie postępuję	1 = rzadko tak postępuję	3 = prawie zawsze tak postępuję	2 = często tak postępuję	2 = często tak postępuję	0 = prawie nigdy tak nie postępuję	2 = często tak postępuję	3 = prawie zawsze tak postępuję
2020-12-16 15:46:43	52	32		single shift	sometimes			in relation with	secondary/post-secondary	independent specialist	3	4			No, I still work in a different workplace	Yes			2 = często tak postępuję	3 – raczej tak													2 = często tak postępuję	0 = prawie nigdy tak nie postępuję	1 = rzadko tak postępuję	2 = często tak postępuję	1 = rzadko tak postępuję	3 = prawie zawsze tak postępuję	0 = prawie nigdy tak nie postępuję	3 = prawie zawsze tak postępuję	2 = często tak postępuję	1 = rzadko tak postępuję	3 = prawie zawsze tak postępuję	1 = rzadko tak postępuję	3 = prawie zawsze tak postępuję	2 = często tak postępuję	0 = prawie nigdy tak nie postępuję	3 = prawie zawsze tak postępuję	0 = prawie nigdy tak nie postępuję
2020-12-16 16:11:38	63	42 years		single shift	No			single, with children	secondary/post-secondary	independent specialist	3	4			Yes	Yes			1 = rzadko tak postępuję	3 – raczej tak													2 = często tak postępuję	1 = rzadko tak postępuję	2 = często tak postępuję	1 = rzadko tak postępuję	1 = rzadko tak postępuję	3 = prawie zawsze tak postępuję	2 = często tak postępuję	1 = rzadko tak postępuję	1 = rzadko tak postępuję	1 = rzadko tak postępuję	2 = często tak postępuję	2 = często tak postępuję	2 = często tak postępuję	1 = rzadko tak postępuję	0 = prawie nigdy tak nie postępuję	2 = często tak postępuję	1 = rzadko tak postępuję
2020-12-16 16:22:16	60	40 years		single shift	No			in relation with	secondary/post-secondary	primary care nurse	3	3			Yes	Yes			2 = często tak postępuję	3 – raczej tak													2 = często tak postępuję	1 = rzadko tak postępuję	0 = prawie nigdy tak nie postępuję	1 = rzadko tak postępuję	0 = prawie nigdy tak nie postępuję	2 = często tak postępuję	1 = rzadko tak postępuję	2 = często tak postępuję	2 = często tak postępuję	0 = prawie nigdy tak nie postępuję	2 = często tak postępuję	2 = często tak postępuję	2 = często tak postępuję	2 = często tak postępuję	0 = prawie nigdy tak nie postępuję	2 = często tak postępuję	1 = rzadko tak postępuję
2020-12-16 21:11:05	22	4 months		shift (12 hours)	sometimes			in a relationship, without the children	bachelor's degree	section nurse	4	5			Yes	Yes			1 = rzadko tak postępuję	3 – raczej tak													3 = prawie zawsze tak postępuję	1 = rzadko tak postępuję	0 = prawie nigdy tak nie postępuję	3 = prawie zawsze tak postępuję	1 = rzadko tak postępuję	3 = prawie zawsze tak postępuję	1 = rzadko tak postępuję	1 = rzadko tak postępuję	2 = często tak postępuję	0 = prawie nigdy tak nie postępuję	2 = często tak postępuję	1 = rzadko tak postępuję	2 = często tak postępuję	2 = często tak postępuję	1 = rzadko tak postępuję	2 = często tak postępuję	1 = rzadko tak postępuję
2020-12-16 22:09:13	46	26		shift (12 hours)	sometimes			in relation with	secondary/post-secondary	ward nurse, coordinating nurse	3	3			No, I still work in a different workplace	Yes			1 = rzadko tak postępuję	3 – raczej tak													2 = często tak postępuję	1 = rzadko tak postępuję	0 = prawie nigdy tak nie postępuję	0 = prawie nigdy tak nie postępuję	1 = rzadko tak postępuję	2 = często tak postępuję	2 = często tak postępuję	1 = rzadko tak postępuję	1 = rzadko tak postępuję	0 = prawie nigdy tak nie postępuję	0 = prawie nigdy tak nie postępuję	1 = rzadko tak postępuję	2 = często tak postępuję	1 = rzadko tak postępuję	0 = prawie nigdy tak nie postępuję	1 = rzadko tak postępuję	0 = prawie nigdy tak nie postępuję
2020-12-17 00:26:19	60	40		single shift	No			single, with children	bachelor's degree	primary care nurse	3	3			Yes	Yes			2 = często tak postępuję	2 – raczej nie													1 = rzadko tak postępuję	1 = rzadko tak postępuję	0 = prawie nigdy tak nie postępuję	2 = często tak postępuję	1 = rzadko tak postępuję	1 = rzadko tak postępuję	1 = rzadko tak postępuję	1 = rzadko tak postępuję	2 = często tak postępuję	0 = prawie nigdy tak nie postępuję	1 = rzadko tak postępuję	2 = często tak postępuję	2 = często tak postępuję	1 = rzadko tak postępuję	1 = rzadko tak postępuję	2 = często tak postępuję	1 = rzadko tak postępuję
2020-12-17 08:42:14	53	30 years		single shift	No			in relation with	higher master's degree	ward nurse, coordinating nurse	4	5			Yes	Yes			2 = często tak postępuję	3 – raczej tak													2 = często tak postępuję	0 = prawie nigdy tak nie postępuję	0 = prawie nigdy tak nie postępuję	2 = często tak postępuję	0 = prawie nigdy tak nie postępuję	3 = prawie zawsze tak postępuję	0 = prawie nigdy tak nie postępuję	0 = prawie nigdy tak nie postępuję	1 = rzadko tak postępuję	0 = prawie nigdy tak nie postępuję	0 = prawie nigdy tak nie postępuję	1 = rzadko tak postępuję	3 = prawie zawsze tak postępuję	1 = rzadko tak postępuję	0 = prawie nigdy tak nie postępuję	2 = często tak postępuję	1 = rzadko tak postępuję
2020-12-17 14:53:22	53	32		single shift	Yes, quite often			in a relationship, without the children	higher master's degree	managing nurse	4	4			Yes	Yes			3 = prawie zawsze tak postępuję	3 – raczej tak													3 = prawie zawsze tak postępuję	0 = prawie nigdy tak nie postępuję	1 = rzadko tak postępuję	2 = często tak postępuję	0 = prawie nigdy tak nie postępuję	3 = prawie zawsze tak postępuję	0 = prawie nigdy tak nie postępuję	2 = często tak postępuję	3 = prawie zawsze tak postępuję	1 = rzadko tak postępuję	2 = często tak postępuję	0 = prawie nigdy tak nie postępuję	3 = prawie zawsze tak postępuję	2 = często tak postępuję	0 = prawie nigdy tak nie postępuję	2 = często tak postępuję	2 = często tak postępuję
2020-12-17 17:00:33	30	2 years		shift (12 hours)	No			in a relationship, without the children	bachelor's degree	independent specialist	4	4			Yes	Yes			1 = rzadko tak postępuję	3 – raczej tak													3 = prawie zawsze tak postępuję	0 = prawie nigdy tak nie postępuję	0 = prawie nigdy tak nie postępuję	3 = prawie zawsze tak postępuję	1 = rzadko tak postępuję	3 = prawie zawsze tak postępuję	1 = rzadko tak postępuję	3 = prawie zawsze tak postępuję	3 = prawie zawsze tak postępuję	0 = prawie nigdy tak nie postępuję	3 = prawie zawsze tak postępuję	1 = rzadko tak postępuję	3 = prawie zawsze tak postępuję	2 = często tak postępuję	2 = często tak postępuję	3 = prawie zawsze tak postępuję	0 = prawie nigdy tak nie postępuję
2020-12-17 21:30:37	24	1.5 years		shift (12 hours)	No			in a relationship, without the children	bachelor's degree	section nurse	4	4			Yes	Yes			2 = często tak postępuję	3 – raczej tak													2 = często tak postępuję	1 = rzadko tak postępuję	1 = rzadko tak postępuję	3 = prawie zawsze tak postępuję	1 = rzadko tak postępuję	2 = często tak postępuję	1 = rzadko tak postępuję	1 = rzadko tak postępuję	2 = często tak postępuję	1 = rzadko tak postępuję	2 = często tak postępuję	1 = rzadko tak postępuję	2 = często tak postępuję	2 = często tak postępuję	1 = rzadko tak postępuję	1 = rzadko tak postępuję	2 = często tak postępuję
2020-12-17 23:43:35	52	31		shift (12 hours)	No			in relation with	bachelor's degree	section nurse	4	5			No, I still work in a different workplace	Yes			2 = często tak postępuję	3 – raczej tak													1 = rzadko tak postępuję	0 = prawie nigdy tak nie postępuję	0 = prawie nigdy tak nie postępuję	1 = rzadko tak postępuję	1 = rzadko tak postępuję	2 = często tak postępuję	2 = często tak postępuję	2 = często tak postępuję	0 = prawie nigdy tak nie postępuję	0 = prawie nigdy tak nie postępuję	1 = rzadko tak postępuję	0 = prawie nigdy tak nie postępuję	1 = rzadko tak postępuję	1 = rzadko tak postępuję	1 = rzadko tak postępuję	1 = rzadko tak postępuję	1 = rzadko tak postępuję
2020-12-18 11:41:40	48	25		shift (12 hours)	No			in connection with children	bachelor's degree	section nurse	4	4			Tak	Yes			2 = często tak postępuję	3 – raczej tak													2 = często tak postępuję	1 = rzadko tak postępuję	0 = prawie nigdy tak nie postępuję	2 = często tak postępuję	1 = rzadko tak postępuję	2 = często tak postępuję	1 = rzadko tak postępuję	1 = rzadko tak postępuję	2 = często tak postępuję	0 = prawie nigdy tak nie postępuję	0 = prawie nigdy tak nie postępuję	1 = rzadko tak postępuję	2 = często tak postępuję	2 = często tak postępuję	1 = rzadko tak postępuję	2 = często tak postępuję	1 = rzadko tak postępuję
2020-12-18 11:59:09	22	4 months		shift (12 hours)	sometimes			Miss / Bachelor	bachelor's degree	section nurse	4	5			Yes	Yes			2 = często tak postępuję	4 – tak													2 = często tak postępuję	0 = prawie nigdy tak nie postępuję	0 = prawie nigdy tak nie postępuję	2 = często tak postępuję	1 = rzadko tak postępuję	2 = często tak postępuję	2 = często tak postępuję	2 = często tak postępuję	2 = często tak postępuję	0 = prawie nigdy tak nie postępuję	2 = często tak postępuję	3 = prawie zawsze tak postępuję	2 = często tak postępuję	2 = często tak postępuję	1 = rzadko tak postępuję	2 = często tak postępuję	3 = prawie zawsze tak postępuję
2020-12-18 11:59:46	22	4 months		shift (12 hours)	sometimes			in relation with	bachelor's degree	section nurse	4	4			Yes	Yes			1 = rzadko tak postępuję	3 – raczej tak													1 = rzadko tak postępuję	0 = prawie nigdy tak nie postępuję	0 = prawie nigdy tak nie postępuję	3 = prawie zawsze tak postępuję	1 = rzadko tak postępuję	2 = często tak postępuję	2 = często tak postępuję	2 = często tak postępuję	3 = prawie zawsze tak postępuję	0 = prawie nigdy tak nie postępuję	2 = często tak postępuję	2 = często tak postępuję	2 = często tak postępuję	3 = prawie zawsze tak postępuję	1 = rzadko tak postępuję	2 = często tak postępuję	0 = prawie nigdy tak nie postępuję
2020-12-18 11:59:53	23	4 months		shift (12 hours)	No			in relation with	bachelor's degree	section nurse	4	5			Yes	Yes			2 = często tak postępuję	3 – raczej tak													2 = często tak postępuję	1 = rzadko tak postępuję	0 = prawie nigdy tak nie postępuję	3 = prawie zawsze tak postępuję	1 = rzadko tak postępuję	3 = prawie zawsze tak postępuję	1 = rzadko tak postępuję	3 = prawie zawsze tak postępuję	2 = często tak postępuję	0 = prawie nigdy tak nie postępuję	2 = często tak postępuję	1 = rzadko tak postępuję	2 = często tak postępuję	3 = prawie zawsze tak postępuję	1 = rzadko tak postępuję	1 = rzadko tak postępuję	1 = rzadko tak postępuję
2020-12-18 12:00:42	34	7		shift (12 hours)	Yes, quite often			in a relationship, with children	bachelor's degree	section nurse	4	4			Yes	Yes			1 = rzadko tak postępuję	3 – raczej tak													3 = prawie zawsze tak postępuję	2 = często tak postępuję	0 = prawie nigdy tak nie postępuję	3 = prawie zawsze tak postępuję	2 = często tak postępuję	2 = często tak postępuję	2 = często tak postępuję	2 = często tak postępuję	2 = często tak postępuję	0 = prawie nigdy tak nie postępuję	2 = często tak postępuję	2 = często tak postępuję	2 = często tak postępuję	2 = często tak postępuję	2 = często tak postępuję	2 = często tak postępuję	2 = często tak postępuję
2020-12-18 12:01:26	44	19 years		shift (12 hours)	No			wdowa/wdowiec	higher master's degree	section nurse	4	5			No, I still work in a different workplace	Yes			2 = często tak postępuję	3 – raczej tak													2 = często tak postępuję	2 = często tak postępuję	0 = prawie nigdy tak nie postępuję	2 = często tak postępuję	1 = rzadko tak postępuję	2 = często tak postępuję	2 = często tak postępuję	3 = prawie zawsze tak postępuję	3 = prawie zawsze tak postępuję	0 = prawie nigdy tak nie postępuję	2 = często tak postępuję	1 = rzadko tak postępuję	2 = często tak postępuję	3 = prawie zawsze tak postępuję	3 = prawie zawsze tak postępuję	2 = często tak postępuję	1 = rzadko tak postępuję
2020-12-18 12:02:43	23	4 months		shift (12 hours)	sometimes			in a relationship	bachelor's degree	section nurse	4	4			No, I still work in a different workplace	Yes			2 = często tak postępuję	3 – raczej tak													2 = często tak postępuję	0 = prawie nigdy tak nie postępuję	0 = prawie nigdy tak nie postępuję	3 = prawie zawsze tak postępuję	1 = rzadko tak postępuję	2 = często tak postępuję	0 = prawie nigdy tak nie postępuję	1 = rzadko tak postępuję	2 = często tak postępuję	0 = prawie nigdy tak nie postępuję	1 = rzadko tak postępuję	0 = prawie nigdy tak nie postępuję	2 = często tak postępuję	2 = często tak postępuję	0 = prawie nigdy tak nie postępuję	2 = często tak postępuję	1 = rzadko tak postępuję
2020-12-18 12:03:26	22	4 months		shift (12 hours)	sometimes			Miss / Bachelor	bachelor's degree	section nurse	5	5			No, I still work in a different workplace	Yes			2 = często tak postępuję	3 – raczej tak													2 = często tak postępuję	0 = prawie nigdy tak nie postępuję	0 = prawie nigdy tak nie postępuję	2 = często tak postępuję	0 = prawie nigdy tak nie postępuję	2 = często tak postępuję	1 = rzadko tak postępuję	1 = rzadko tak postępuję	2 = często tak postępuję	0 = prawie nigdy tak nie postępuję	2 = często tak postępuję	1 = rzadko tak postępuję	2 = często tak postępuję	2 = często tak postępuję	1 = rzadko tak postępuję	2 = często tak postępuję	2 = często tak postępuję
2020-12-18 12:04:27	40	16		shift (12 hours)	Yes, quite often			in a relationship, without the children	bachelor's degree	section nurse	4	5			Yes	Yes			1 = rzadko tak postępuję	3 – raczej tak													2 = często tak postępuję	1 = rzadko tak postępuję	0 = prawie nigdy tak nie postępuję	1 = rzadko tak postępuję	1 = rzadko tak postępuję	3 = prawie zawsze tak postępuję	1 = rzadko tak postępuję	2 = często tak postępuję	3 = prawie zawsze tak postępuję	0 = prawie nigdy tak nie postępuję	3 = prawie zawsze tak postępuję	1 = rzadko tak postępuję	3 = prawie zawsze tak postępuję	2 = często tak postępuję	0 = prawie nigdy tak nie postępuję	0 = prawie nigdy tak nie postępuję	2 = często tak postępuję
2020-12-18 12:04:50	22	3 months		shift (12 hours)	No			Miss / Bachelor	bachelor's degree	independent specialist	4	4			Yes	Occasionally			2 = często tak postępuję	3 – raczej tak													2 = często tak postępuję	1 = rzadko tak postępuję	0 = prawie nigdy tak nie postępuję	2 = często tak postępuję	2 = często tak postępuję	2 = często tak postępuję	2 = często tak postępuję	1 = rzadko tak postępuję	3 = prawie zawsze tak postępuję	0 = prawie nigdy tak nie postępuję	2 = często tak postępuję	2 = często tak postępuję	1 = rzadko tak postępuję	3 = prawie zawsze tak postępuję	2 = często tak postępuję	2 = często tak postępuję	2 = często tak postępuję
2020-12-18 12:05:21	22	4 months		shift (12 hours)	sometimes			in relation with	bachelor's degree	section nurse	5	4			Yes	Yes			1 = rzadko tak postępuję	3 – raczej tak													1 = rzadko tak postępuję	0 = prawie nigdy tak nie postępuję	0 = prawie nigdy tak nie postępuję	2 = często tak postępuję	1 = rzadko tak postępuję	1 = rzadko tak postępuję	2 = często tak postępuję	1 = rzadko tak postępuję	1 = rzadko tak postępuję	0 = prawie nigdy tak nie postępuję	1 = rzadko tak postępuję	3 = prawie zawsze tak postępuję	1 = rzadko tak postępuję	2 = często tak postępuję	2 = często tak postępuję	1 = rzadko tak postępuję	0 = prawie nigdy tak nie postępuję
2020-12-18 13:58:34	22	3 months		shift (12 hours)	No			Miss / Bachelor	bachelor's degree	independent specialist	5	5			Yes	Yes			2 = często tak postępuję	3 – raczej tak													0 = prawie nigdy tak nie postępuję	2 = często tak postępuję	1 = rzadko tak postępuję	2 = często tak postępuję	1 = rzadko tak postępuję	1 = rzadko tak postępuję	1 = rzadko tak postępuję	0 = prawie nigdy tak nie postępuję	2 = często tak postępuję	2 = często tak postępuję	0 = prawie nigdy tak nie postępuję	1 = rzadko tak postępuję	2 = często tak postępuję	1 = rzadko tak postępuję	1 = rzadko tak postępuję	1 = rzadko tak postępuję	2 = często tak postępuję
2020-12-18 15:26:08	23	3 months		shift (12 hours)	No			Miss / Bachelor	higher master's degree	section nurse	5	4			Yes	Yes			3 = prawie zawsze tak postępuję	3 – raczej tak													3 = prawie zawsze tak postępuję	2 = często tak postępuję	0 = prawie nigdy tak nie postępuję	3 = prawie zawsze tak postępuję	0 = prawie nigdy tak nie postępuję	2 = często tak postępuję	1 = rzadko tak postępuję	2 = często tak postępuję	3 = prawie zawsze tak postępuję	0 = prawie nigdy tak nie postępuję	2 = często tak postępuję	0 = prawie nigdy tak nie postępuję	2 = często tak postępuję	3 = prawie zawsze tak postępuję	0 = prawie nigdy tak nie postępuję	2 = często tak postępuję	2 = często tak postępuję
2020-12-19 20:10:28	56	36		shift (12 hours)	No			in relation with	higher master's degree	section nurse	4	4			No, I still work in a different workplace	Yes			2 = często tak postępuję	2 – raczej nie													2 = często tak postępuję	0 = prawie nigdy tak nie postępuję	0 = prawie nigdy tak nie postępuję	2 = często tak postępuję	1 = rzadko tak postępuję	2 = często tak postępuję	0 = prawie nigdy tak nie postępuję	2 = często tak postępuję	2 = często tak postępuję	0 = prawie nigdy tak nie postępuję	2 = często tak postępuję	2 = często tak postępuję	2 = często tak postępuję	2 = często tak postępuję	0 = prawie nigdy tak nie postępuję	2 = często tak postępuję	1 = rzadko tak postępuję
2020-12-19 20:33:35	55	38		shift (12 hours)	No			in relation with	secondary/post-secondary	section nurse	3	4			Yes	Yes			2 = często tak postępuję	3 – raczej tak													2 = często tak postępuję	0 = prawie nigdy tak nie postępuję	0 = prawie nigdy tak nie postępuję	2 = często tak postępuję	0 = prawie nigdy tak nie postępuję	2 = często tak postępuję	0 = prawie nigdy tak nie postępuję	2 = często tak postępuję	2 = często tak postępuję	0 = prawie nigdy tak nie postępuję	2 = często tak postępuję	1 = rzadko tak postępuję	2 = często tak postępuję	2 = często tak postępuję	0 = prawie nigdy tak nie postępuję	0 = prawie nigdy tak nie postępuję	0 = prawie nigdy tak nie postępuję
2020-12-20 21:51:57	23	3 months		shift (12 hours)	sometimes			in relation with	bachelor's degree	section nurse	5	5			Yes	Yes			1 = rzadko tak postępuję	2 – raczej nie													2 = często tak postępuję	0 = prawie nigdy tak nie postępuję	0 = prawie nigdy tak nie postępuję	3 = prawie zawsze tak postępuję	0 = prawie nigdy tak nie postępuję	3 = prawie zawsze tak postępuję	0 = prawie nigdy tak nie postępuję	0 = prawie nigdy tak nie postępuję	3 = prawie zawsze tak postępuję	0 = prawie nigdy tak nie postępuję	0 = prawie nigdy tak nie postępuję	3 = prawie zawsze tak postępuję	3 = prawie zawsze tak postępuję	3 = prawie zawsze tak postępuję	0 = prawie nigdy tak nie postępuję	1 = rzadko tak postępuję	1 = rzadko tak postępuję
2020-12-20 21:58:30	35	9 years		single shift	sometimes			with children	bachelor's degree	independent specialist	4	4			Yes	Occasionally			1 = rzadko tak postępuję	2 – raczej nie													1 = rzadko tak postępuję	1 = rzadko tak postępuję	0 = prawie nigdy tak nie postępuję	1 = rzadko tak postępuję	2 = często tak postępuję	1 = rzadko tak postępuję	2 = często tak postępuję	0 = prawie nigdy tak nie postępuję	0 = prawie nigdy tak nie postępuję	0 = prawie nigdy tak nie postępuję	0 = prawie nigdy tak nie postępuję	3 = prawie zawsze tak postępuję	1 = rzadko tak postępuję	1 = rzadko tak postępuję	2 = często tak postępuję	0 = prawie nigdy tak nie postępuję	0 = prawie nigdy tak nie postępuję
2020-12-21 11:23:44	58	38		shift (12 hours)	sometimes			in a relationship, without the children	bachelor's degree	section nurse	4	3			Yes	Yes			2 = często tak postępuję	3 – raczej tak													3 = prawie zawsze tak postępuję	0 = prawie nigdy tak nie postępuję	0 = prawie nigdy tak nie postępuję	2 = często tak postępuję	1 = rzadko tak postępuję	3 = prawie zawsze tak postępuję	0 = prawie nigdy tak nie postępuję	1 = rzadko tak postępuję	1 = rzadko tak postępuję	0 = prawie nigdy tak nie postępuję	1 = rzadko tak postępuję	1 = rzadko tak postępuję	3 = prawie zawsze tak postępuję	2 = często tak postępuję	0 = prawie nigdy tak nie postępuję	2 = często tak postępuję	1 = rzadko tak postępuję
2020-12-21 19:30:07	48	4		shift (12 hours)	sometimes			with kids	secondary/post-secondary	section nurse	3	3			No, I still work in a different workplace	Yes			2 = często tak postępuję	3 – raczej tak													2 = często tak postępuję	1 = rzadko tak postępuję	0 = prawie nigdy tak nie postępuję	2 = często tak postępuję	0 = prawie nigdy tak nie postępuję	3 = prawie zawsze tak postępuję	1 = rzadko tak postępuję	2 = często tak postępuję	2 = często tak postępuję	0 = prawie nigdy tak nie postępuję	1 = rzadko tak postępuję	0 = prawie nigdy tak nie postępuję	2 = często tak postępuję	2 = często tak postępuję	1 = rzadko tak postępuję	2 = często tak postępuję	1 = rzadko tak postępuję
2020-12-21 20:42:06	24	2,5 years		shift (12 hours)	sometimes			in a relationship, without the children	higher master's degree	section nurse	5	5			No, I still work in a different workplace	Yes			2 = często tak postępuję	3 – raczej tak													3 = prawie zawsze tak postępuję	1 = rzadko tak postępuję	0 = prawie nigdy tak nie postępuję	1 = rzadko tak postępuję	2 = często tak postępuję	2 = często tak postępuję	2 = często tak postępuję	1 = rzadko tak postępuję	0 = prawie nigdy tak nie postępuję	0 = prawie nigdy tak nie postępuję	2 = często tak postępuję	2 = często tak postępuję	2 = często tak postępuję	1 = rzadko tak postępuję	1 = rzadko tak postępuję	2 = często tak postępuję	2 = często tak postępuję
2020-12-21 22:15:24	47	27		shift (12 hours)	No			in relation with	higher master's degree	ward nurse, coordinating nurse	5	4			Yes	Yes			2 = często tak postępuję	3 – raczej tak													2 = często tak postępuję	2 = często tak postępuję	1 = rzadko tak postępuję	2 = często tak postępuję	1 = rzadko tak postępuję	2 = często tak postępuję	1 = rzadko tak postępuję	1 = rzadko tak postępuję	2 = często tak postępuję	1 = rzadko tak postępuję	2 = często tak postępuję	1 = rzadko tak postępuję	2 = często tak postępuję	2 = często tak postępuję	1 = rzadko tak postępuję	2 = często tak postępuję	2 = często tak postępuję
2020-12-24 10:00:33	52	32		two-shift	No			in a relationship, without the children	bachelor's degree	primary care nurse	4	4			Yes	Yes			2 = często tak postępuję	3 – raczej tak													2 = często tak postępuję	1 = rzadko tak postępuję	1 = rzadko tak postępuję	2 = często tak postępuję	1 = rzadko tak postępuję	2 = często tak postępuję	1 = rzadko tak postępuję	1 = rzadko tak postępuję	2 = często tak postępuję	1 = rzadko tak postępuję	2 = często tak postępuję	0 = prawie nigdy tak nie postępuję	2 = często tak postępuję	2 = często tak postępuję	0 = prawie nigdy tak nie postępuję	2 = często tak postępuję	1 = rzadko tak postępuję
2020-12-25 16:01:36	45	25 years		shift (12 hours)	No			Miss / Bachelor	higher master's degree	section nurse	3	3			Yes	No			1 = rzadko tak postępuję	2 – raczej nie													0 = prawie nigdy tak nie postępuję	1 = rzadko tak postępuję	0 = prawie nigdy tak nie postępuję	0 = prawie nigdy tak nie postępuję	3 = prawie zawsze tak postępuję	1 = rzadko tak postępuję	0 = prawie nigdy tak nie postępuję	1 = rzadko tak postępuję	2 = często tak postępuję	0 = prawie nigdy tak nie postępuję	1 = rzadko tak postępuję	3 = prawie zawsze tak postępuję	1 = rzadko tak postępuję	1 = rzadko tak postępuję	3 = prawie zawsze tak postępuję	2 = często tak postępuję	0 = prawie nigdy tak nie postępuję
2020-12-26 10:38:57	55	35 years		single shift	No			Miss / Bachelor	higher master's degree	section nurse	4	3			No, I still work in a different workplace	Yes			2 = często tak postępuję	4 – tak													2 = często tak postępuję	1 = rzadko tak postępuję	0 = prawie nigdy tak nie postępuję	3 = prawie zawsze tak postępuję	1 = rzadko tak postępuję	3 = prawie zawsze tak postępuję	2 = często tak postępuję	3 = prawie zawsze tak postępuję	3 = prawie zawsze tak postępuję	0 = prawie nigdy tak nie postępuję	3 = prawie zawsze tak postępuję	3 = prawie zawsze tak postępuję	3 = prawie zawsze tak postępuję	3 = prawie zawsze tak postępuję	0 = prawie nigdy tak nie postępuję	3 = prawie zawsze tak postępuję	3 = prawie zawsze tak postępuję
2020-12-26 18:57:02	49	22		single shift	Yes, quite often			in relation with	higher master's degree	independent specialist	4	3			Yes	Yes			1 = rzadko tak postępuję	3 – raczej tak													3 = prawie zawsze tak postępuję	1 = rzadko tak postępuję	0 = prawie nigdy tak nie postępuję	3 = prawie zawsze tak postępuję	1 = rzadko tak postępuję	3 = prawie zawsze tak postępuję	1 = rzadko tak postępuję	2 = często tak postępuję	3 = prawie zawsze tak postępuję	0 = prawie nigdy tak nie postępuję	3 = prawie zawsze tak postępuję	0 = prawie nigdy tak nie postępuję	3 = prawie zawsze tak postępuję	3 = prawie zawsze tak postępuję	0 = prawie nigdy tak nie postępuję	2 = często tak postępuję	1 = rzadko tak postępuję
2020-12-28 13:06:02	30	7		shift (12 hours)	sometimes			in a relationship, without the children	higher master's degree	section nurse	4	5			Yes	Occasionally			3 = prawie zawsze tak postępuję	3 – raczej tak													2 = często tak postępuję	1 = rzadko tak postępuję	0 = prawie nigdy tak nie postępuję	1 = rzadko tak postępuję	1 = rzadko tak postępuję	2 = często tak postępuję	2 = często tak postępuję	3 = prawie zawsze tak postępuję	1 = rzadko tak postępuję	0 = prawie nigdy tak nie postępuję	1 = rzadko tak postępuję	2 = często tak postępuję	2 = często tak postępuję	1 = rzadko tak postępuję	1 = rzadko tak postępuję	0 = prawie nigdy tak nie postępuję	2 = często tak postępuję
2021-01-19 22:39:27	49	26		shift (7,35 h)	No			in relation with	higher master's degree	primary care nurse	4	4			Yes	Yes			2 = często tak postępuję	3 – raczej tak													3 = prawie zawsze tak postępuję	0 = prawie nigdy tak nie postępuję	0 = prawie nigdy tak nie postępuję	2 = często tak postępuję	1 = rzadko tak postępuję	3 = prawie zawsze tak postępuję	2 = często tak postępuję	2 = często tak postępuję	2 = często tak postępuję	1 = rzadko tak postępuję	2 = często tak postępuję	1 = rzadko tak postępuję	2 = często tak postępuję	2 = często tak postępuję	1 = rzadko tak postępuję	2 = często tak postępuję	1 = rzadko tak postępuję
2021-01-21 01:57:17	36	1.5		shift (12 hours)	Yes, quite often			in a relationship, without the children	higher master's degree	section nurse	5	2			Yes	No			2 = często tak postępuję	3 – raczej tak													1 = rzadko tak postępuję	1 = rzadko tak postępuję	1 = rzadko tak postępuję	2 = często tak postępuję	1 = rzadko tak postępuję	2 = często tak postępuję	2 = często tak postępuję	2 = często tak postępuję	2 = często tak postępuję	1 = rzadko tak postępuję	2 = często tak postępuję	2 = często tak postępuję	2 = często tak postępuję	2 = często tak postępuję	1 = rzadko tak postępuję	1 = rzadko tak postępuję	2 = często tak postępuję
2021-01-21 11:17:25	40	16		single shift	Yes, quite often			single, with children	higher master's degree	independent specialist	4	4			No, I still work in a different workplace	Occasionally			1 = rzadko tak postępuję	3 – raczej tak													2 = często tak postępuję	0 = prawie nigdy tak nie postępuję	0 = prawie nigdy tak nie postępuję	2 = często tak postępuję	0 = prawie nigdy tak nie postępuję	2 = często tak postępuję	0 = prawie nigdy tak nie postępuję	1 = rzadko tak postępuję	2 = często tak postępuję	0 = prawie nigdy tak nie postępuję	2 = często tak postępuję	0 = prawie nigdy tak nie postępuję	2 = często tak postępuję	3 = prawie zawsze tak postępuję	0 = prawie nigdy tak nie postępuję	2 = często tak postępuję	1 = rzadko tak postępuję
[truncated: 102 more columns]
